# Supplementary material for: The Origin and Diversity of Cpt1 Genes in Vertebrate Species
Source: PubMed Central journal article supplement (PMC4589379; doi:10.1371/journal.pone.0138447), 2015-09-30
Supplement: pone.0138447.s001.pdf [file pone.0138447.s001.pdf]

Supporting information 1 Fig: MAFFT Sequence alignment with gaps

|        |                           |                           |                           |                           |                           |                           |                           |                           |                           |                           |           |    |
|--------|---------------------------|---------------------------|---------------------------|---------------------------|---------------------------|---------------------------|---------------------------|---------------------------|---------------------------|---------------------------|-----------|----|
| Hsa1C  | MABEAHQAVGF               | RPSLSTSDGAE               | VELSAPVLQE                | IYLSGLRSWK                | RHLRSFVWDF                | LTGVFPASP                 | SWLFLFSAIQ                | L-AWFLQLDP                | SLGLMEKIKE                | LLPDW----                 | 94        |    |
| SSc1C  | .....P.....G.....P.L..... | .....P.....G.....P.L..... | .....P.....G.....P.L..... | .....P.....G.....P.L..... | .....P.....G.....P.L..... | .....P.....G.....P.L..... | .....P.....G.....P.L..... | .....P.....G.....P.L..... | .....P.....G.....P.L..... | .....P.....G.....P.L..... | 94        |    |
| MmulC  | .....SSL                  | LS.S.....S.W.....         | .....CA.....              | .....W.V.....             | .....A.V.....             | .....T.....               | .....CL.....              | .....                     | .....                     | .....                     | 94        |    |
| Hsa1A  | .....A                    | QFTV.P.ID                 | LR.HEA.RQ                 | .....H.....               | KKFI.K.GI                 | I...Y...S                 | ...IVVVGVM                | T-TMYAKI..                | ...IIA.NR                 | T.ETA----                 | 94        |    |
| MmulA  | .....A                    | QFTV.P.ID                 | LR.HEA.RQ                 | .....C.....H.....         | KKFI.K.GI                 | I...Y...S                 | ...IVVVGVI                | S-SMHTKV..                | ...MIA.NR                 | T.DTT----                 | 94        |    |
| Mdola  | .....A                    | QFTV.P.ID                 | LR.HEA.RQ                 | .....H.....               | KKFI.K.GI                 | I...Y...S                 | ...IVVVGVM                | S-TMYAKV..                | ...IIA.NQ                 | T.DMT----                 | 94        |    |
| GgalA  | .....A                    | QFTV.P.ID                 | LRM.HEA.KQ                | .....VH.....              | KKFI.K.GI                 | I...Y...S                 | ...IVVVGVM                | S-TMYAKI..                | ...IIA.NR                 | T.DTT----                 | 94        |    |
| FpelA  | .....A                    | QFTV.P.ID                 | LRM.HEA.KQ                | .....VH.....              | KKFI.K.GI                 | I...Y...S                 | ...IVVVGVM                | S-TMYAKI..                | ...IIA.NR                 | T.DTT----                 | 94        |    |
| AcalA  | .....A                    | QFTV.P.ID                 | LRM.HEA.RQ                | .....Y.....               | KKFI.K.GI                 | I...Y...S                 | ...IVVVGVM                | S-TMYAKI..                | ...IIA.NR                 | T.DIT----                 | 94        |    |
| XtrlA  | .....A                    | QFTV.P.ID                 | LR.HEA.RQ                 | .....H.....               | KKFI.K.GI                 | I...Y...S                 | ...IVVVGVT                | SASMYTKV..                | ...F.II..NN               | A.SAT----                 | 95        |    |
| LchlA  | .....A                    | QFTV.P.ID                 | LR.HEA.RQ                 | .....H.....               | KKFI.K.GI                 | I...Y...S                 | ...VVVGVV                 | S-TMYTRV..                | ...MIAR.SQ                | R.VT----                  | 94        |    |
| Ler1A  | .....A                    | QFTV.P.ID                 | LQ.HEA.KQ                 | V.....                    | KRFR.YK.GI                | I...Y...S                 | ...VVV.VI                 | A-TMYARV..                | ...MI..RC                 | H..TN----                 | 94        |    |
| XtrlC  | .....A                    | QFTV.PE.ID                | LR.HEA.KQ                 | V.....                    | KKFA.VK.S                 | I...Y...S                 | ...VVI..M                 | G-TLYARV..                | ...M.MI..LR               | H..AS----                 | 94        |    |
| Ler1C  | .....A                    | QFTV.PE.ID                | LQ.RHA.K                  | .....I.....               | KKCN.IK.N                 | M...Y...S                 | ...I.VVLTVV               | G-TMYTRV..                | ...M.IAMLR                | HI.LR----                 | 94        |    |
| CmilC  | .....A                    | QFTV.PE.ID                | LQ.HQA.K                  | .....V.A.....             | KRCA.IR.NI                | V...Y...S                 | ...VALTVV                 | G-TMYTRV..                | ...M.MIG...               | H..VK----                 | 94        |    |
| AcalC  | .....A                    | QFTVSPE.ID                | LQ.HVAFK                  | .....V.....               | KKCNQLR.G                 | V...Y...S                 | ...MVT..L                 | V-TQYSR..                 | ...M.MID...               | H..VS----                 | 94        |    |
| LchlC  | .....A                    | QFTV.PE.ID                | LK.HEA.KQ                 | VF...Q.....               | KR.A.LK.S                 | I...M.Y...S               | ...VI..M                  | A-TLYARV..                | ...M.MID...               | H..VKVQEFY                | 99        |    |
| Tnl1A  | .....A                    | QFTV.P.ID                 | LQ.CHEA.RQ                | V.....H.....              | KRPI.K.GV                 | M...Y.G.A                 | GFMIVVGSYM                | SYNKYNR..                 | ...M.VV.LGQ               | YI.IG----                 | 95        |    |
| Tru1A  | .....A                    | QFTVSP.ID                 | LQ.CHEA.RQ                | .....H.....               | KRPI.K.GV                 | M...Y.G.G                 | GFMIVVGSYM                | SYNKYNR..                 | ...M.FVV.LGQ              | YI.IS----                 | 95        |    |
| On1A   | .....A                    | QFTV.PE.ID                | LH.HEA.RQ                 | V.....IH...               | KRFV.K.GI                 | M...Y.G.A                 | GFSIVVGSYM                | AYNK.K.....               | ...FT.LGQ                 | HI.IS----                 | 95        |    |
| Gac1A  | .....A                    | QFTVSP.ID                 | LQ.HEA.RQ                 | .....H.....               | KRPI.K.GV                 | M...Y.G.G                 | GFMVVVVSYM                | SYNKQYQ..                 | ...IA.LGQ                 | HM.IS----                 | 95        |    |
| Dre1Aa | .....A                    | QFTV.P.ID                 | LH.CHEA.RQ                | .....IH...                | KRPI.K.GV                 | M...Y.G.S                 | GLVVVLVGYM                | SSTKYAKI..                | ...LLT.LST                | H..VS----                 | 95        |    |
| TfulA2 | .....A                    | QFTV.P.ID                 | LQ.CHEA.RQ                | .....A.H.....             | KRPI.K.GV                 | M...Y.G.T                 | GL.GVVGGYL                | IFTKYANI..                | ...T.VVA.LAP              | H..VC----                 | 95        |    |
| Dre1Ab | .....A                    | QFTVGP.ID                 | LQ.HEA.RQ                 | V.....IH...               | KKFI.K.GI                 | N...Y.G.AP                | GFLVLLAGYL                | GR.QY.KV..                | ...LF.LGN                 | YV.IS----                 | 95        |    |
| TfulA1 | .....A                    | QFTVSP.ID                 | LQ.HEA.RQ                 | V.....H.....              | KKFI.K.GI                 | M...Y.G.AP                | GLMLVLAGYM                | GR.KYA.V..                | ...VFR.GK                 | YV.IS----                 | 95        |    |
| OlalCa | .....A                    | QFTV.PE.ID                | LR.HQA.S                  | .....V.....               | KRII.IK.SV                | I...Y...S                 | ...VVI..L                 | A-TMYTRS..                | ...M.IIA..Q               | H..VS----                 | 94        |    |
| On1Cb  | .....A                    | QFTV.PE.ID                | LQ.HQA.T                  | .....M.....               | KRIV.VK.SV                | I...Y...S                 | ...VVI..L                 | A-TMYTRS..                | ...M.IA..Q                | H..VS----                 | 94        |    |
| AmelC  | .....A                    | QFTI.PE.ID                | LQ.HEA.RQ                 | V.....                    | KRIV.LK.NV                | I...Y...S                 | ...VVI..L                 | A-TMYTRS..                | ...M.IA..Q                | H..AS----                 | 94        |    |
| Gac1C  | .....A                    | QFTVSP.ID                 | LH.HQA.T                  | .....V.....               | KRVIGL.K.SV               | V...Y...LS                | ...VVI..L                 | A-TMYTRS..                | ...M.IA..Q                | H..RP----                 | 94        |    |
| Tru1C  | .....A                    | EFTVIPE.D                 | AQ.HQA.T                  | .....AVN...               | KCII.IK.SV                | I...Y...F                 | ...VVI..L                 | A-TMYTRS..                | ...M.IA..Q                | N..VS----                 | 94        |    |
| Tnl1C  | .....A                    | EFTVIPE.TD                | AQ.HQA.T                  | .....AVH...               | KCII.IK.SV                | IK..Y...F                 | ...VVI..L                 | A-TMYTRS..                | ...M.IA..Q                | N..VS----                 | 94        |    |
| OlalCb | .....A                    | QFTI.PE.ID                | LQ.YQA.NQ                 | .....V.....               | KRV..MR.RV                | IK..Y...S                 | ...VAIG.L                 | A-TIYM.S..                | ...M.IAE.QQ               | R..LS----                 | 94        |    |
| On1Ca  | .....A                    | QFTI.PE.ID                | LQ.YQA.NQ                 | .....V.....               | KRV..VR.SL                | IK..Y...S                 | ...VAIG.L                 | A-TMYM.S..                | ...M.IT..QQ               | H..LS----                 | 94        |    |
| Gac1C  | .....A                    | QFTI.PE.ID                | LQ.HQA.NQ                 | F...V.....                | KRV..MR.RV                | IK..Y...S                 | ...VVI..L                 | A-TMYMRS..                | ...M.IKM.QQ               | H..LR----                 | 94        |    |
| Tr1C   | .....A                    | QFTI.PE.ID                | LQ.YQA.NQ                 | .....V.....               | KRV..VR.SL                | IK..Y...S                 | ...VSI..L                 | A-TMYMRS..                | ...M.IT..QH               | H..LS----                 | 94        |    |
| Dre1C  | .....A                    | QFTISPE.IN                | LH.YQA.NQ                 | .....                     | KRI..IK.RI                | IK.AY...S                 | ...IVI..L                 | A-TMYM.S..                | ...M.IA..Q                | H..LS----                 | 94        |    |
| Dre1B  | .....A                    | QFTV.P.ID                 | LQ.RE..KH                 | .....I..VT...             | KRAI.K.SV                 | I...Y...S                 | ...VVI..M                 | S-TMYARI..                | ...M.TID..T               | S..VS----                 | 94        |    |
| On1B   | .....A                    | QFTVRP.VD                 | FK.QE.IKN                 | .....VTA...               | KKAIQ.K.GV                | A..Y...S                  | ...IVVI.MM                | S-SLYIHI..                | ...M.DA..                 | N..YR----                 | 94        |    |
| Gac1B  | .....A                    | QFTVRP.VD                 | LK.QE.IKT                 | .....VTA...               | KKAIQ.K.GV                | A..Y...S                  | ...IVVI.MM                | S-SLYIHI..                | ...M.IALQ                 | N..HR----                 | 94        |    |
| OlalB  | .....A                    | QFTVRP.V                  | LK.QE.IKN                 | .....TV...                | KKAIQ.K.SV                | I...Y...S                 | ...IVVI.MM                | S-SLYTNT.L                | ...MIDA..                 | N..HR----                 | 94        |    |
| Tru1B  | .....A                    | QFTVRP.V                  | LK.QE.IKN                 | .....TA...                | KKAIQ.K.GV                | A..Y...S                  | ...IVVI.MM                | S-SLYTRV..                | ...M.IAM..                | N..YR----                 | 94        |    |
| Tnl1B  | .....A                    | QFTVRP.V                  | LK.QE.IKN                 | .....TA...                | KKAIQ.K.GV                | A..Y...S                  | ...IVVI.MM                | S-SLYI.V.L                | ...M.IAM..                | N..YR----                 | 94        |    |
| Hsa1B  | .....A                    | QFTV.P.VD                 | FR.REA.KH                 | V.....IN...               | KR.I.IK.GI                | R..Y.G.T                  | ...VVIM.TV                | G-SS.CNV.I                | ...VSC.QR                 | C..QGGC---                | 96        |    |
| MmulB  | .....A                    | QFTV.P.VD                 | FR.REA.RH                 | V.....IN...               | KR.I.IK.GI                | R..Y.G.T                  | ...VVVM.TV                | G-SNYCKV.I                | ...M.VDC.QR               | C..ERYG---                | 96        |    |
| MdolaB | .....A                    | QFTV.P.VD                 | FQ.REA.KH                 | V.....IN...               | KR.I.IK.GI                | R..Y.G.T                  | ...VVVMTM                 | G-SSYCNV.L                | ...M.MICR                 | KY.IEGCC---               | 96        |    |
| ShalB  | .....A                    | QFTV.P.VD                 | FQ.REA.KH                 | V.....IN...               | KRPI.IK.GI                | R..Y.G.T                  | ...VVVM.TM                | G-SSYCNV.I                | ...M.MICH                 | KY.IEGCS---               | 96        |    |
| AcalB  | .....A                    | QFTV.PE.VD                | FQ.REA.KQ                 | V.....VS...               | KR.A.LK.SI                | I...Y...S                 | ...G..AVVAVT              | G-TYFGI.V                 | ...V.IFR.QK               | RY.NSCR---                | 96        |    |
| FpelB  | .....A                    | QFTV.PE.LD                | FH.REAVRQ                 | L..A.IS...                | KR.V.AK.S                 | I...Y...S                 | ...MVVVM.TA               | G-SFYC.V..                | ...MIAR.RH                | C..ES----                 | 94        |    |
| XtrlB  | .....A                    | QFTV.P.ID                 | LQ.HEA.RH                 | LW.....                   | VACR                      | KR.ITLKSSV                | S..Y...S                  | T.FAVVAMTL                | G-SLYGK...                | ...IT..NS                 | I..GK---- | 94 |
| LchlB  | .....A                    | .....                     | .....                     | .....MNL.L                | H--VFVQ.SL                | I...Y...S                 | ...VVVV.TI                | G-TRVVKM..                | ...I.DY.RS                | AI.RS----                 | 57        |    |
| Dm     | .....A                    | SFAI.HE.FD                | INVDHE..NL                | VWN..V.....               | KR.A.AR.GV                | RN..Y..HIQ                | ..LWLISAIAL               | G-LH.AGYQA                | PFN.TNR.LV                | H..SN----                 | 94        |    |
| ci     | .....A                    | SF.V.QE.LN                | QI.HEAM.A                 | V.F.V...R                 | KR.T.R.RV                 | S...VKYT                  | ..LVG.TAIVL               | ..S..SY.I                 | TW.FKNNRTN                | II.PR----                 | 94        |    |

|        |            |            |            |             |            |            |               |            |           |              |     |
|--------|------------|------------|------------|-------------|------------|------------|---------------|------------|-----------|--------------|-----|
| Hsa1C  | ---GG----  | -QHHLGRGVL | AAALFASCLW | GALIFTLHVA  | LRLLLSYHGW | LLEPH---GA | MSSPTKTWL-    | -ALVRIF--- | -----SG-R | H-PMLFSYQR   | 169 |
| SSc1C  | ---A-----  | ...R...I.. | .....      | .....       | .....      | ...T....V  | .....         | .....      | .....     | .....        | 169 |
| MmulC  | .....      | ...Q.Q.F.  | S..V.....  | .....H..... | .....      | .....      | .....         | .....      | .....     | ...R...F..   | 169 |
| Hsa1A  | ---NC----- | -MSSQTKNIV | SGV..GTG.. | V...V.MRYS  | .KV.....   | MFTE....K  | ..RA..I.M-    | -GM.K....  | .....     | K...Y.F.T    | 169 |
| MmulA  | ---R-----  | -MSSQTKNIV | SGV..GTG.. | V.I.M.MRYS  | .KV.....   | MFAE....K  | ..RS.RI.M-    | -M.KV....  | .....     | K...Y.F.T    | 169 |
| Mdola  | ---S-----  | -MSSQTKNIV | SGI..GTG.. | VT..VAMRYS  | .KM.....   | MFAE....K  | L.RG.RI.M-    | -GM.K....  | .....     | K...Y.F.T    | 169 |
| GgalA  | ---Y-----  | -MSNQTQNI  | SGI..GTG.. | V...V.MRYS  | .KM.....   | MFAE....K  | L.AG..L.M-    | -T.KL....  | .....     | K...Y.F.T    | 169 |
| FpelA  | ---Y-----  | -MSNQTQNI  | SGV..GTG.. | V...V.MRYS  | .KM.....   | MFAE....K  | L.AG..F.M-    | ...KL....  | .....     | K...Y.F.T    | 169 |
| AcalA  | ---Y-----  | -MSNQTQNI  | SGV..GTG.. | V...SMRYT   | .KM.....   | MFAE....K  | L.TG..I.M-    | -T.KL....  | .....     | K...Y.F.T    | 169 |
| XtrlA  | ---Y-----  | -MTPQTQNI  | SGV..GTG.. | VS..A.MRYS  | .KK.....   | MF.E....K  | L.AS.RI.M-    | -GM.KLL--  | .....     | K...Y.F.T    | 170 |
| LchlA  | ---TH----- | -LSSQSQNI  | SGV..GTG.. | V..F..MRYS  | .KM.....   | MFIE....K  | VPFG.RI.I-    | -R.KL....  | ...V-C    | K...Y.F.T    | 169 |
| Ler1A  | ---Y-----  | -LSNQSESI  | SGL..STG.. | I..V..MRQT  | .K.....    | MFV....K   | TPTSV.L.M-    | -LI.K....  | .....     | K...LTY.F.T  | 169 |
| XtrlC  | ---SY----- | -LS.QGQSIV | S.L..STG.. | F...M.MRFI  | .KQ.....   | MY.Q....K  | ..AT..L..-    | ...K....   | .....     | N...Y..A     | 169 |
| Ler1C  | ---RY----- | -MS.HGQSMV | S.M...TG.. | L...VMRQI   | .KT.....   | MF.E....K  | V..T..V.F-    | -T.K....   | .....     | K...Y.F.N    | 169 |
| CmilC  | ---RC----- | -LS.QGQNIM | S.L...TV.. | L...YMRQI   | .KT.....   | MF.E....K  | A.NM.RI.F-    | -TM.K....  | .....     | K...Y.F.A    | 169 |
| AcalC  | ---Y-----  | -LSDQGMNI  | S..T.STV.. | L...M.MRSI  | .KM...C... | MY.E....K  | ..NT..I..-    | ...KM....  | ...A-     | K...Y..A     | 169 |
| LchlC  | QTARTKTNP  | QITDKRINL  | CTN.YQCIGY | SEILL----   | .....      | MF.E....K  | NR.V.LT..I.I- | -T.K....   | .....     | K...Y..A     | 168 |
| Tnl1A  | ---RY----- | -LSTDTQKIV | GGV.VGTG.. | VTI.MIMRNV  | .KS...W... | MH.R....S  | V.WTSRA.M-    | -L.KV....  | .....     | K...Y.F.N    | 170 |
| Tru1A  | ---RY----- | -LSTDTQKIV | GGV.VGTG.. | VTI.MIMRNV  | .KS...W... | MY.R....S  | I.WTSRA.M-    | -L.KV....  | .....     | K...Y.F.N    | 170 |
| On1A   | ---RY----- | -MSTDSQKIV | GGI.VGTG.. | VTI.MIMRTV  | .KS...W... | MQ.R....S  | L.WSSRI.M-    | -V.KV....  | .....     | K...Y.F.N    | 170 |
| Gac1A  | ---RY----- | -MSTDSQKIV | GGV.VGTG.. | VSI.MIMRSV  | .KS...W... | MYTS....S  | VAWS.RL.M-    | -V.KV....  | .....     | K...Y.F.N    | 170 |
| Dre1Aa | ---KY----- | -ITEDGQRIV | GGV.VGTG.. | I.VT.VMRN   | .KY...W... | MFNQ....T  | L.LK..I..-    | -V.KL....  | ...P      | K...Y.F.S    | 170 |
| TfulA2 | ---KY----- | -ITEDTQQIV | GGI.VGTG.. | T.V..FMRNM  | .KC...W... | MFNR....T  | ..IR..I..-    | ...KL....  | ...P      | K...Y.F.S    | 170 |
| Dre1Ab | ---RY----- | -MSEBQKMLV | GGVMVGTG.. | I.I..GMRTV  | .KG...W... | MFAS....R  | ..TWKIRL..-   | -VF.KV.... | .....     | MQ T...Y.F.N | 171 |
| TfulA1 | ---KY----- | -MSLDNQSRV | GGI.VGTG.. | VVI..MRSI   | .KC...W... | MR.R....S  | LTWK.QI..-    | -V.KV....  | ...M      | KT.N.Y.F.T   | 171 |
| OlalCa | ---QS----- | -MSSQCCA.V | S.V..STM.. | LL...MRLC   | .KQ....R.. | MF.Q....K  | ..TT..I.V-    | .....      | .....     | K..L.Y..G    | 169 |
| On1Cb  | ---QS----- | -MSTQCCA.V | S.V..STM.. | LM...MRLC   | .KQ....R.. | MF.Q....K  | ..TT..I.V-    | .....      | .....     | K..L.Y..G    | 169 |
| AmelC  | ---S-----  | -MSMQCCT.V | S.V..STL.. | LS...MKLC   | .KQ....R.. | MF.Q....K  | N.V.TT..V.V-  | -M.....    | .....     | Q..L.Y..G    | 169 |
| Gac1C  | -----      | -YVM..     | S.S.AVTM.. | LL...MRMC   | .KQ....R.. | MF.K....K  | ..NT..V.V-    | -V.ASHRSL  | FVTVNQPS- | K..L.Y..G    | 171 |

|        |           |            |             |            |           |            |            |            |            |            |     |
|--------|-----------|------------|-------------|------------|-----------|------------|------------|------------|------------|------------|-----|
| TrulC  | --QS----  | -LSTQCKVL  | S.VI.STM..  | LL....MRLC | .KQ....R  | MF.....K   | .TT.V.V-   | -----      | -----      | K-R.Y...A  | 169 |
| Tn1c   | --QS----  | -LSTQCKVL  | S.VI.STM..  | LL....MRLC | .KQ....R  | MF.....K   | .TT.V.V-   | -----      | -----      | K-R.Y...G  | 169 |
| Ola1Cb | --LHVS--- | -LSAQGQTMV | S.LV.STL..  | LS..LA.RFC | .K.....Q  | MF.Q....R  | V.NT.V.V-  | -T.L.LL--- | -----      | K-L.Y...T  | 171 |
| OnilCa | --FF----  | -LFTQGGTMV | S.LV.STL..  | LS..LA.RFC | .K.....Q  | MF.K....R  | I.NT.V.V-  | -P...LL--- | -----S-    | K-L.Y...S  | 169 |
| Gac1C  | --QPF---- | -LSTQGGTMV | S.LV.STL..  | LS..LA.RFC | .K.....Q  | MF.Q....R  | V.NT.V.V-  | -T.L.LL--- | -----S-    | K-L.Y...T  | 170 |
| TrilC  | --LHMS--- | -LSAQGQTM  | S.LV.STL..  | LS..LA.RFC | .K.....R  | MF.Q....R  | V.NF.V.V-  | -T.LGLL--- | -----S-    | K-L.Y...T  | 171 |
| Dre1C  | --LS----  | -LSPOGGTM  | S.L.STL..   | MS..L.RFC  | .K.....R  | MF.Q....H  | .TK.V.V.A- | -T.KLL---  | -----S-    | K-L.Y...T  | 169 |
| Dre1B  | --EF----  | -MTVQQT..  | S.I...TG..  | LSV..L.RYL | .KA.....A | IF.S....K  | .YS.V.V-   | -S.KLL---  | -----      | R-L.Y.F.G  | 169 |
| OnilB  | --DC----  | -MSVQT.A.  | S.I...TG..  | LF..YL.RYT | .KA.....  | IF.S....K  | .TS.V.V-   | -C.KM---   | -----      | R-L.Y.F.A  | 169 |
| Gac1B  | --DY----  | -LSVQSA.A. | S.I...TG..  | LF..YL.RYM | .KA.....  | IF.S....K  | .RS.V.V-   | -S.KM---   | -----      | R-L.Y.F.A  | 169 |
| Ola1B  | --Y-----  | -MSAQT.A.  | S.I...GTG.. | LF..YL.RYT | .KA.....  | IF.S....K  | .S.L.V-    | -Y.KM---   | -----      | R-L.Y.F.A  | 169 |
| TrulB  | --DC----  | -MSVQT.A.  | S.I...TG..  | LF..YL.RYT | .KA.....  | IF.S....K  | .TS.V.V-   | -T.KM---   | -----      | R-L.Y.F.A  | 169 |
| Tn11B  | --D-----  | -MSVQT.A.V | S.I...TG..  | LF..YL.RYT | .KA.....  | IF.S....K  | .TS.V.V.L  | QT.KM---   | -----      | R-L.Y.F.A  | 171 |
| Hsa1B  | --PY----  | -TPQT.AL   | SM.I.STGV   | VTG..FFRQT | .K...C... | MF.M....K  | T.NL.RI.A- | -MCI.LL--- | -----S-    | ...Y.F.T   | 171 |
| MmulB  | --HF----  | -GTPQTEAL  | SMVI.STGV   | ATG..FFRQT | .K.....   | MF.M....SK | T.HA..I.A- | -IC.LL---  | -----S-    | ...Y.F.T   | 171 |
| Mdo1B  | --RY----  | -LTLQT.TLI | SVGI.STGV   | VTG..LFRQT | .K.....   | MF.L....Q  | T.RT..I.A- | -IC.LL---  | -----N-    | R...Y.F.T  | 171 |
| Sha1B  | --NY----  | -LTLQT.TLI | SVGI.STGV   | VTG..LFRQT | .K.....   | MF.M....Q  | T.RI..I.A- | -IC.LL---  | -----N-    | R...Y.F.T  | 171 |
| Aca1B  | --RC----  | -LGVRS.SL  | S.LI.S.GA   | MLGVLLRRQ  | .....     | MF.....K   | TRPS..I.A- | -SM.VM---  | -----      | ...Y.F.T   | 171 |
| Fpe1B  | --RL----  | -LSYES.TMV | STVI.STGA   | LSAVLLFRQ  | .K.....   | MF.....K   | .RS.RI.V-  | -L.MKVL--- | -----I-    | K-L.Y.F.T  | 169 |
| Xtr1B  | --SI----  | -LAPVS.T.  | S.VI.S.GV   | VSG.LIYRQT | .I.....   | MF.....KK  | T.MK..I.A- | -GCMK.M--- | -----S-    | Q...Y.F.M  | 169 |
| LchB   | --C-----  | -MSFRS.TL  | S.T...TGV   | VTG.LAVRYS | .A.C....  | MF.....S   | TRIR.RI.A- | -T.K...--- | -----      | ...Y.F.T   | 131 |
| Dm     | --TI----  | -NWQ.T     | .CF.A.LVV   | VLSIC.MRYT | .K...M.K. | MY.SRAPGSR | V.L.ML.V-  | -V.VL---   | -----SWN   | K-G.Y.F.G  | 169 |
| ci     | --K-----  | -DSKTRN-T  | SYLVSSTL..  | LLAVLVIRYL | .K...C.Q. | MF..R---K  | .LK..L.AV  | -SYLQLL--- | -----K-YFT | Q-NVM.LLVC | 169 |

|        |             |              |            |             |            |             |            |            |            |                |     |
|--------|-------------|--------------|------------|-------------|------------|-------------|------------|------------|------------|----------------|-----|
| Hsa1C  | SLPRQPVPVSV | QDTRVRYLES   | VRPILSDEDF | DWTAVALQEF  | LRLQASLLQW | YLRKLSKSWAS | NYVSDWEEF  | VYLRSRNPLM | VNSNYMMDF  | LYVTPPLQA      | 269 |
| SSc1C  | .....A      | .....V.CE    | E.ISA.R.R  | .K.....     | .Q.Y...    | .....S      | .....I.T   | .....G.S   | .....I.T   | .....N.V       | 269 |
| MmulC  | A.....A     | E.....V.G.DA | .RATA.ND   | .....H.PR.L | .Q...CT    | .....Y      | .....G.S   | .....I.T   | .....A.L   | .....IL.HI     | 268 |
| Hsa1A  | ...L...A    | K...NR..Q    | ..LMKE...D | KRMTA..D    | AVGLGPR..  | .K.....T    | .....Y     | I...G.G.I  | .....A.L   | .....IL.HI     | 269 |
| MmulA  | ...L...A    | K...SR...    | ..LMKEG..  | QRMTA..D    | AVNLGPK..  | .K.....T    | .....Y     | I...G.G.I  | .....A.EM  | .....I..HI     | 269 |
| Mdo1A  | ...L...A    | K...NR...    | .Q.L.NKDN  | QRMKG..ED   | STNLGPR..  | .K.....T    | .....Y     | I...G.S.I  | .....A.L   | .....IL.TI     | 269 |
| Gga1A  | ...L...A    | K...NR...    | ..LMN..E   | KRMEG..KD   | AFNLGPR..  | .K.....T    | .....Y     | I...G.G.I  | .....FA... | .....HLS.TI    | 269 |
| Fpe1A  | ...L...A    | N...NR...    | ..LMD..E   | RRMEG..KD   | AFNLGPR..  | .K.....T    | .....Y     | I...G.G.I  | .....FA... | .....LS.T      | 269 |
| Aca1A  | ...L...L    | KN.NR...     | .H.LMNE.Q  | KRMEA.GKD   | ATNLGPK..  | .K.....A    | .....Y     | I...G.G.I  | .....FA... | .....F..SV     | 269 |
| Xtr1A  | ...L...P    | K...KR..D    | .K.LMDK.K  | ERMEG..KD   | ANNLGP...R | .K.....T    | .....Y     | I...G.G.I  | .....A...  | .....L.HI      | 270 |
| Lch1A  | ...L...A    | K...MTR...   | ..LMD..Q   | RRMTK..KD   | ELKLGRR..  | .K.....T    | .....Y     | I...G.G.I  | .....A.L   | .....          | 269 |
| Ler1A  | ...L...T    | K...M.....   | ..L.N.KE   | QRMQA..     | ELKVGPR..  | .K.....T    | .....Y     | I...G.G.I  | .....A.Y   | .....IV..V     | 269 |
| Xtr1C  | V...L...G   | KE..QR..D    | ..LMN..EY  | KRMTG..KD   | EVNL.PR... | .K.....A    | .....Y     | I...G.G.I  | .....A...  | .....V         | 269 |
| Ler1C  | ...L...P    | ..L.RF...    | ..LMN...   | RR.KA..KD   | E.NL.PR... | .I.....     | .....Y     | ..QG.E.I   | .....A...  | .....TS        | 269 |
| CmilC  | ...L...TI   | ..MQR...     | ..LMN..E   | HRMEA..KD   | EVKLGPR..  | .K.....T    | .....Y     | .....G.E.I | .....A...  | .....I         | 269 |
| Aca1C  | ...L...AL   | K...MQ...    | I..LTT.AE  | QRM.A.RD    | EQTLGPR..  | .K.....     | .....Y     | ...G.G.    | .....A...  | .....I..V      | 269 |
| Lch1C  | C...L...PI  | AK.MQR...    | .H.LMD.K   | KRMTA..KD   | EVNL.PR... | .K.....     | .....Y     | I...G.G.I  | .....G...  | .....I.AS.YI.T | 268 |
| Tn11A  | ...L...DI   | S...C.RH...  | ..ALMD..Q  | ERMTA.TKD   | EKNLGP...R | .K.....     | .....Y     | I...G.G.I  | .....A...  | .....I.SI      | 270 |
| TrulA  | ...L...A    | S...C.R...   | .H.LMDE.R  | ERMTA..KD   | EKNLGP...R | .K.....S    | .....Y     | I...G.S.I  | .....A...  | .....F.SI      | 270 |
| OnilA  | ...L...I    | K...CER...   | ..LMD.QQ   | ERMKG.T.D   | EKNLGP...R | .K.....     | .....Y     | I...G.G.I  | .....A...  | .....F.SI      | 270 |
| Gac1A  | ...L...I    | K...CKR...   | ..LME.QY   | QRMKG.TKD   | EKNLGP...R | .K.....     | .....Y     | I...G.G.I  | .....A...  | .....F.SI      | 270 |
| Dre1Aa | ...L...P    | K...R...     | A..LMD..QY | KRMKG..KD   | EKNLGP...R | .K.....T    | .....Y     | I...G.S.I  | .....A...  | .....N.S       | 270 |
| Tfu1A2 | ...L...P    | EH..KR...    | ..LMD..QY  | KRMEA..KD   | QSNLGP...R | .K.AF...    | .....DY    | I.V.G.G.I  | .....A...  | .....F.H.V     | 270 |
| Dre1Ab | ...HLF...   | KE.T.R...    | .Q.L...EH  | QRMQR..LD   | E.NLGP...R | .K.....T    | .....Y     | I...G.G.I  | .....V...  | .....AF.NI     | 271 |
| Tfu1A1 | ...NL.L...  | K...MKR...   | ..L.D.TEY  | KKMEE..SD   | QKTL.PK.H  | .K.....T    | .....Y     | I...G.G.I  | .....A...  | .....H.L.H     | 271 |
| Ola1Ca | ...NL...AI  | K...KR...    | ..LMN.GEY  | ERMTK..A    | ESSLGNR..  | .K.AL...    | .....Y     | ...G.S.I   | .....G...  | .....I         | 269 |
| OnilCb | ...NL...TI  | K...KR...    | ..LMD.KEY  | ERMTK..A    | ESSLGNR..  | .K.AL...    | .....Y     | ...G.G.I   | .....G...  | .....I         | 269 |
| Ame1C  | ...NL...AI  | K...KR...    | ..LK..SE   | ERMTN..K    | EDSLG.R... | .K.AL...    | .....Y     | I...G.G.I  | .....G...  | .....I         | 269 |
| Gac1C  | ...NL...LI  | K...NRH...   | ..LMD.TEY  | ERMTS.SED   | ESGLGKR..  | .K.AL.T     | .....Y     | ...G.S.I   | .....G...  | .....M...      | 271 |
| TrulC  | ...NL...A   | K...KR...    | ..LMD.AQY  | EHVTK..A    | ESSLGNR..  | .K.AL.VT    | .....Y     | ...G..I    | .....V...  | .....I         | 269 |
| Tn11C  | ...NL...A   | K...KR...    | ..LMD.AQY  | ERV.K.A.A   | ESSLGNR..  | .K.AL.VT    | .....Y     | ...G.S.I   | .....V...  | .....I         | 269 |
| Ola1Cb | ...HL...A   | R...LTR...   | ..L.T.PEY  | KRMTD..N    | ESSLGNR..R | .K.AL.T     | .....Y     | I...G.G.I  | .....G...  | .....SV        | 271 |
| OnilCa | ...HL...AI  | ...SR..T     | ..L.T.LE   | KRMTD..N    | ESNLGNR..R | .K.AL.T     | .....Y     | ...G.I     | .....G...  | .....SV        | 269 |
| Gac1C  | ...HL...PI  | K...SR..T    | A..L.T.PE  | ERMTK..GQ   | EANLGNR..R | ...AL.T     | .....Y     | I...G.G.I  | .....G...  | .....V         | 270 |
| TrilC  | ...HL...AI  | K...LSR..R   | ..L.N.LEY  | KRMSE..SD   | EKNLGNR..R | .K.AL.T     | .....Y     | I...G.G.I  | .....G...  | .....SV        | 271 |
| Dre1C  | ...HL...PI  | K...LER...   | .K.L.DLDG  | QRMR..TS    | EKSLGNR..R | ...AL.T     | .....Y     | ...S.I     | .....G...  | .....N         | 269 |
| Dre1B  | ...HL...I   | D...I.R...   | ..L.D.QY   | KQMETV.ND   | KKDP.PK.K  | H.K...T     | .....Y     | I...G.D.I  | .....F.T.L | .....I.YR      | 269 |
| OnilB  | ...L...D    | D...IHR...   | ..L.DN.QY  | NKMEL..SD   | KENK.AQ..R | C.I...T     | .....Y     | I...G.S.I  | .....F.I.L | .....HR        | 269 |
| Gac1B  | ...L...D    | D...IHR...   | .H.L.NSDQY | .QMER..ND   | KDSK.AQ..R | .I...GT     | .....Y     | I...G.S.I  | .....F.I.L | .....I.HR      | 269 |
| Ola1B  | ...L...R    | D...I.R...   | ..L.DK.QY  | SQMET..ND   | KESK..Q.R  | .I...T      | .....Y     | I...G.G.I  | .....F.I.L | .....I.HR      | 269 |
| TrulB  | ...L...D    | D...IHR...   | ..L.VSDEY  | .QVMT..K    | KDSK.AQ..R | .I...T      | .....Y     | I...S.I    | .....F.I.L | .....I.HR      | 269 |
| Tn11B  | ...L...D    | D...IHR...   | ..L.VSDEY  | .QVMT..K    | KDSK.AQ..R | .I...T      | .....Y     | I...S.I    | .....F.I.L | .....I.HR      | 271 |
| Hsa1B  | ...KL...R   | S...IQR...   | ..L.D.EY   | YRMEL..K    | QDKT.PR.K  | .V...T      | .....Y     | I...G.S.   | .....V.L   | VLIKN.DV       | 271 |
| MmulB  | ...KL...K   | PA.IHR..D    | ..L.D.AY   | YRMET..K    | QDKT.PR.K  | .V...T      | .....Y     | ...S.      | .....A...  | VLIKN.NV       | 271 |
| Mdo1B  | ...KL...K   | AA.IHR...    | ..L.D.QY   | YRMEM..KD   | QKPT.PR.K  | .V...T      | .....Y     | I...G.S.V  | .....V...  | VFTQH.NI       | 271 |
| Sha1B  | ...KL...K   | SA.IKR...    | ..L.D.EY   | YRMEM..KD   | QKPT.PR.K  | .V...T      | .....Y     | I...G.I    | .....V...  | VLTPH.EV       | 271 |
| Aca1B  | ...KL...R   | A...IQR...   | ..L.DE.R   | LDMEA..LD   | QQRL-IR.K  | .L...T      | .....Y     | I...G.S.I  | .....V...  | T..H           | 270 |
| Fpe1B  | ...KL...P   | EA.ITR...    | ..LMD.KY   | SKMEA..K    | KEKT.PR.K  | .I...TT     | .....QY    | I..HG.S    | .....A...  | .....SHI       | 269 |
| Xtr1B  | ...KL...PL  | E...IER..Q   | ..L.D.DK   | SEMKI..E    | QKDLGRK.K  | .H...L      | .....Y     | I...G.G.I  | .....A.Y   | .....STN       | 269 |
| LchB   | C...HL...   | E...LHR...   | ..L.N.LQY  | KRMEA.TIQ   | KHQT.PR.K  | .L...T      | .....Y     | ...T.I     | .....A.L   | .....II.SSV    | 231 |
| Dm     | ...L...L    | K...MTR..R   | ..L.D.NY   | TRMER..K    | EQTIGKK..  | .I...ST     | .....Y     | ...G.S.C   | .....F.G.T | IFMNL.DK       | 269 |
| ci     | LITKTNIIK   | EGLGI..YKE   | LKRFIYEKSY | EKNVRLSLH   | TSN-----K  | L.ITNPDFI   | IHS.NR..QY | ...AG.G.I  | .....G.L   | ...HN...V      | 263 |

|       |            |           |           |            |           |           |           |            |            |            |     |
|-------|------------|-----------|-----------|------------|-----------|-----------|-----------|------------|------------|------------|-----|
| Hsa1C | ARAGNAVHAL | LLYRHLNRQ | EIPPT-L-L | MG-MRPLCSA | QYKIFNTTR | IPGVQK-DY | IRLHDSQHV | AVFHRGRFFR | MGTHSRNSLL | SPRALEQQFQ | 363 |
| SSc1C | .....F     | .....F    | .....F    | .....F     | .....F    | .....HR   | .....H    | .....H     | .....R     | .....R     | 363 |
| MmulC | ...T...L   | ...S...L  | ...S...L  | ...S...L   | ...S...L  | ...RM     | ...E      | ...H       | ...L       | ...Q.R     | 362 |
| Hsa1A | ...I...I   | ...RK.D.E | ...K.I-R  | ...L.STI   | ...W.RM   | ...S      | ...EET    | ...T       | ...Q.MR    | ...K.I     | 364 |
| MmulA | ...TI...I  | ...RTVD.E | ...LK.I-R | ...L.STI   | ...W.RL   | ...S      | ...EET    | ...T       | ...Q.VK    | ...R.I     | 364 |
| Mdo1A | ...I.SI    | ...KK.D.E | ...LK.I-R | ...L.STV   | ...W.RM   | ...S      | ...EET    | ...T       | ...Q.VK    | ...R.I     | 364 |
| Gga1A | ...II...I  | ...KK.D.  | ...K.I-R  | ...L.STV   | ...W.RM   | ...S      | ...EES    | ...T       | ...LQ.VK   | ...K.I     | 364 |
| Fpe1A | ...VI...I  | ...FK.D.  | ...K.I-R  | ...L.STV   | ...W.RM   | ...S      | ...EES    | ...V       | ...LQ.VK   | ...K.I     | 364 |

Acala .....I.I .....RK.D.E Q.Q.I-... ..STV..... W.RM...S. ...EET--T .Q.IK.K.I V.Y.K.C.YK VWLYYDGR.. K.EI...M. 364
XtrlA .....I.I .....RK.D.E .K.I-Q-... ..STV..... W.RMY...S. ...EET--T .Q.VK.K.I V.Y.K.Y.K VWLYHDGR.. K.EI.H.M. 365
LchlA .....TI.I .....RK.D.E .K.L-M--I QN-TI.M.S ..RM...S. ...ET--T LQ.MR.K.I V.Y.K.Y.K VWLYHDGR.. K.EI...M. 363
LerlA .....TI.M .....RK.D.E .H.L-M--... -QI.M.S ..RM...SS. ...LET--T MQ.K.K.. V.Y.K.Y.K VWLYHSGR.. ..CEIQL.M. 361
XtrlC .....A.T...I .....RKVT.E .L.K.L-M--I QD-CL.M.S ..HM..... ..DT--T .Q.YA.K.I V.Y.K... VVYQGR.. N.KE...L. 363
LerlC .....L.....R.A.E QVQ.S-T-- P.FPI..... W.RM...S. L..EET--R LQ.QA.K.. M.Y.K.Y.K VWLYQSGR.Q ..SE.QK... 364
CmilC .....LT.....RK.T.E .K.S-T-- P.LPV..... S.W.RM...S. T..QET--H LQ.QT.K.I V.Y.K.Y.K VVYQGR.. R.E.V... 364
AcalC .....L.Y.M MM.RK.VQE .K.M--I Q.-CL.M... W.RM..... MEG--S .Q.Q.R.I .Y.A... VLLYHNGRM. R.E.QA... 363
LchlC .....I.Y.C .Q.RKVT.E .L.K.L--I QD-CL.M... H.HM...S. ...IET--T LQ.T.K.I V.Y.K... VVYHGGRM. K.E.I.IE 364
TnilA .....I.I.M .....RK.D.A Q.K.L-M-- QN-TI.M... ..RM..... V...ET--T LQ.TNETK.I V.Y.K... K.VMFDYGR. L.EI...ME 362
TrulA .....I.I.M .....RK.D.A Q.K.IY... AN-KV..... W.RM..... V...ET--T LQ.TIETK.I V.Y.K... K.VWFDYGR. L.EI...ME 365
OnilA .....I.SI M.....RK.D.A Q.K.L-M-- LH-TI.M... ..RM..... V...ET--T LQ.VNE.K.I V.Y.K.Y.K VMFDYGR. L.EI...ME 364
GaclA .....I.I.M .....RK.D.A Q.K.IY... AN-KV..... W.PM..... V...LET--I LQ.VN.K.I .Y.K... K.VMFDYGR. L.EI...MA 365
DrelAa .....SI.M MM.RK.D.A Q.K.L-M--V LN-TI.M.S ..RM...S. V...ET--V LQ.VNE.K.I .Y.K... YK.VMFDYGR. L.EI...ME 364
TfulA2 .....I.SI M.....RK.D.A Q.K.L-M--V QN-TI.M.S ..RM..... V...EE--F .K.VNE.K.I V.Y... K.VMFDYGR. L.EI...ME 364
DrelAb .....VI.I M.....RK.D.A Q.K.L-M-- QN-TI.M.S ..RM...S. ...IET--S VQ.VS.R.I V.Y... Y.K.VMFDYGR. L.EI...ME 365
TfulA1 .....TI.SI M.....RK.D.A Q.K.L-- QN-TI.M.S ..RM...S. ...IET--T .Q.VS.R.I V.Y.K.Y.K VSMFDYGR. L.EI...IE 365
OlaiCa .....SI.F F.....RK.KE .K.S-R--I P.TVI...A. .C.R..... ..EET--T VQ.WK.DY. .Y.K.Y. LRVYQAGR.. ..E.F.I. 364
OnilCb .....SI.SF F.....RK.KE .L.K.W-- RS-AV.C.Y .F.RM.D.C. ...ILTAK.T VQ.WQ.DYI V.Y.K.Y. LRVYQAGR.. ..E.F.I. 365
AmelC .....TL.V M.....R...KE .K.S-R--I P.TFI...A. .C.R..... ..EET--T VV.WQ.EY. .Y...Y. LWLYQAGRM. ..E.I.Y.I. 364
GaclC .....SI.Y F.....RK.KE .L.K.-R--I P.TVI...A. .C.RM..... ..EETGT.T VQ.WQ.DYI .Y...Y. LRMVHAGR.. ..E.I.S.I. 368
TrulC .....TIY.M .....CK.KE .K.P-AQW. LRSAV.C.Y .F.RM...C. ...TLT--T .Q.WK.DFI V.Y.K.Y.K LRVYQAGR.. C.EI.F.I. 366
TnilC .....TIY.M .....SK.KE .K.P-AQW. LRSAV.C.Y .F.RM...C. ...TLT--T LH.WN.ECI V.Y.K... Q.LCVYQGR.. C.EI.F.I. 366
OlaiCb .....TIT...RMV.E .L.T.S-R--V P.TVI...A. .C.RM..... T...ET--V LQ.WQ.EF. .YS...Y. LWVYRAGR.. .A.EI.H.I. 366
OnilCa .....TIT...RKV.E .L.K.S-R--V P.TVI...A. .C.RM..... T...ET--V LQ.WL.EF. .Y...Y. LWVYRAGR.. ..E.I.Y.I. 364
GaclC .....TIT...RKV.E .L.K.S-R--V P.TVI...A. .C.RM..... T...ET--V LQ.WQ.EF. .Y...Y. LWVYLAGR.. ..E.H.I. 365
TrilC .....TIT...RKV.E .L.K.L-W--C ICTVI...A. .C.RM..... T..EET--V LQ.WQ.EF. .Y.K... LWVYRAGR.M ..E.Y.I. 366
DrelC .....TIT...F.....RKV.E .LN.S-R--I P.TVI...A. .C.RM..... T..EET--V LQ.WQ.EF. .Y...Y. LWVYRAGR.. ..EIQF.I. 364
DrelB .....V.M.Q .RK.E.G .LT.L-R--A L.-IV.M.F ..RM..... ..IET--F VQ.K.RK.L V.Y... L.K.VWLYYGRH. W.SE...L. 363
OnilB .....V.M.Q .RK.E.G .LA.L-R--A L.-TV.M.T ..RM..... ..IET--F VQ.T.RK.L V...K... Q.VWLYTGRH. L.SE...T. 363
GaclB .....V.M.Q .RK.E.G .HA.L-R--A L.-TV.M.T .M.R..... ..IET--I VQ.T.RK.L V.Y.K... L.LWLYTGRH. L.SE...T. 363
OlaiB .....I.M.Q .RK.E.G .HA.L-R--A L.-TV.M.T .M.R..... ..IET--V VQ.S.RK.L I.Y.K... Q.VWLYTGRH. L.SE...M. 363
TrulB .....M.M.Q .RK.E.G .HA.L-R--A L.-TV.M.T .M.R..... L..IET--A VL.T.RK.L I.Y.K... Q.VWLYTGRH. L.SE...L. 363
TnilB .....T.M.Q .RK.E.G .HA.L-R--A L.-TV.M.T .M.RM..... ..IET--V VQ.T.RK.L I.Y.K... Q.VWLYTGRH. L.SE...L. 365
HsalB .....L.II.M IM.RK.D.E .K.V-M--A L.-IV.M.Y .M.RM..... ..KDT--V LQ.S.R... .Y.K... K.LWLYEGAR.. K.QD...M. 365
MmulB .....L.SV...M IM.RK.D.E .K.V-M--A L.-IV.M.Y .M.RM..... ..KET--L LQ.SER... .Y.K... K.VWLYEGSR.. K.D...M. 365
MdolB .....L.SV...M IM.RK.D.E .K.V-M--A L.-IV.M.Y .M.RM..... L..KDT--V LQ.L.R... .Y.K... YK.LWLYQSGTQ.. K.D...M. 365
ShalB .....L.V...M IM.RK.D.E .K.V-M--A L.-IV.M.Y .M.RM..... ..KES--V LQ.V.R... .Y.K... YK.VWLYQGTQ.. K.D...M. 365
AcalB .....SI.....R.D.E DLA.V-M--A L.-VV...Y .M.R..... ..K.A--R LL.S.R.L ...K... K.VWLYHAGK.. P.D...M. 364
FpelB .....M.M.I M.....RK.D.G .M-M--A L.-IV.M.Y .S.RM..... ..KET--T LL.V.K.L .Y.K... YK.VWLYYGGQ.. Q.CD...L. 363
XtrlB .....VI.M .....RK.E.G L...V-M--A L.-IV.M.N .MVRM..... V...ET--C LQ.VE.R... C.Y.K.Y. LALYENGN.. T.Q.QA.I. 366
LchlB .....T.M.M .....RK.D.E .K.M-M--A LK-LV.M.N .V.RM..... ..LET--GT VK--Q.AL. YIYNKAV.VD CMLY.LS-- VKLDIL.KQK 320
Dm .....A.VISL. .NF.RLLEH. .LQ.I-M--V Q.-I...W ..RT...A. V..LET--R .I.YR..N.I V.L.K.CYK .LIIYKGR.I. R.CE.QV.IE 363
ci .....S.A.I...M FAF.ST.DKE L.K.I-K--V N.-VV..... ..RV...SC. T...EA--R .C.WS.CR.I .Y.Q.W.K .TCYKGNV.. E.SEM.I.IE 357

HsalC RILDDPSPAC PHEEHLAALT AAP----R-- GTWAQVTRSL KTQA--AEAL EAVEGAFFV SLDAEPAGLT -----RED PAASLDAYAH ALLAGRHDR 448
SSclC .....DM.....K... ..E..... ..S...DA AGDTPPSG. S..... 455
MmulC .....L.....SM.....E.V .H.--T. .... 447
HsalA .....NT.EPQ .G.AR..... .GD----- VP..RC.QAY FGRGKNKQS. D...K... T...ETEE.YR -----S... .DT.M.S.K S.H..CY.. 451
MmulA .....Q...T.EPQ .G.AK..... .GD----- VP..KC.QTY FARGKNKQS. D...K... T...ESEQ.YR -----E... .E.I.S.K S.H..CF.. 451
Mdola .....EPQ AG.K..... .GD----- VP..KA.QTY FSRGKNKQS. D...K... TM.DTEQ.YS -----KK.. .LT.M.S.K S.H..KCY.. 451
GgalA .....D.EPQ AG.K..... .GD----- VP..KA.QAY FSRGKNKQS. D...K... T...DDEQ.YS -----K... .VS.....K S.H..CY.. 451
FpelA .....N.D.EPQ AG.K..... .GD----- VP..KA.QAY FSRGKNKQS. D...K... T...DIEQ.YR -----KD.. .VK.....K S.H..CY.. 451
AcalA .....W...K.KPQ .G.K..... .GD----- VP..KA.QTY FARGKNKQS. D.I.K... T...DTAQ.YR -----E... .VTMET.T.K S.H..KCY.. 451
XtrlA .....K.I...T.SPQ .G.K..... .GD----- VP..KA.KAY FANGKNKQSM D...K... T...ETEY.YN -----K... .VN...S.K S.H..KCY.. 452
LchlA .....D.KPQ .G.K..... .GD----- VP..KA.QY FCRGKNKLS. D...K... T...DTEQ.FR -----K... .VT...R.K S.H..KCY.. 450
LerlA .....K...Q.LPQ TG.K..... .GD----- VP..KA.TY FS.GRNKLS. .I.K... T...DTEQ.FR -----K.E .IS...N.K S.H..KCY.. 448
XtrlC .....N.N...PQ .G.K..... .GE----- TA..KA.KTY FRSGKNLQ.. DL.R... T...QDDEE.R -----T... .VN...GK S.H..KCY.. 450
LerlC .....Y...A.IPQ .G.KY..... .GN----- IP..K.K.KY FSSGKNKT.M DS.K... T...EDTPE.F -----VDN QVK...Q.K S.H..KCY.. 451
CmilC .....A.T.LPQ .G..... .GN----- IP..GKA.K.F FSNNGNRS. DC.K...L T...GDKP.Q -----V... .VK.....K L.H.KCY.. 451
AcalC .....S.G...T.PS .G.K.P... .GE----- DP..RA.NAF FQTGQNEQS. SI.K... T...TSEQ.R -----EPN .GQ.....K S.H..CC.. 450
LchlC .....K.A.K.SPL .G...P... .GD----- VP..KA.RDY FOSGLNRQS. DL.K... T...ESEQ.K -----TD.. .K...K L.H.KCY.. 449
TnilA .....K.A.Q.APQ .G.K..... .GTG----- TP..NA.DTY FSRGKNKQ.. D.I.K... T...DTEQRYD -----TNN .VV...S.K C.H.KCY.. 452
TrulA .....A.Q.EPL .G.R..... .GD-----RG TP..NA.DTY FSRGKNKQS. D.I.K... T...DTEQCYD -----TNN .VT...S.K S.H..KCY.. 454
OnilA .....A.K.EPL .G.R..... .GD----- TP..KA.E.F FSRGKNKQS. D...K...L T...DTEQRYD -----TKN .VK...I.K S.H..KCY.. 451
GaclA .....A.TTEPM .G.K..... .GD----- TP..NA.ETY FSRGKNKQS. D.I.K...C. T...DTEQRFE -----SDN .DQ..VS.K S.H..KCY.. 452
DrelAa .....A.K.EPQ .G.F..... .GD----- VP..KA.SQF FIRGKNKQS. D...K... T...DSEQRYE -----PDN .IQ...S.GK S.H..KCY.. 451
TfulA2 .....A.T.MPQ .G.T..... .GD----- VP..KA.EF FSTGKNRKS. D...R... T...DTEQRYE -----PDN .VQ...S.K S.H..KCY.. 451
DrelAb .....A.T.EPQ .G.T..... .GDSVCQ-- VP..CA.NAY LRHGNTNKS. DS.K... T...DTEQRFD -----QKN .VE...R.K S.H..KCY.. 456
TfulA1 .....A.T.EPQ .G.K..... .GD----- VP..CA.DAY LR.GKNRQS. D...K... T...DTEQRHN -----SDS .E..RSFGK S.H..KCY.. 452
OlaiCa .....A.PS KG.AK.G... .D----- VS..EA.VKY FSSGINKRS. DVI.R... T...D.EQ.TM -----D.QP.....N.K S.H..KCY.. 451
OnilCb .....PS KG.AK.G... .GD----- IP..KA.KY FSSGINKRS. DCI.K... T...D.EQ.MM -----GD. ....R.K S.H..KCY.. 452
AmelC .....PS KG.AK.G.F. .GD----- IP..KA.KEF FSSGINKRS. DCI.K... T...DDEQ.MM -----GD. ....NV.R.K S.H..KCY.. 451
GaclC .....K...PA .G.K.AK.G... .GD----- IP..KA.AKY FSNNGNRS. DFI.K... T...DDEQ.FV -----AD. ...TRI.S.K S.H..KCY.. 454
TrulC .....S KG.AK.G... .GD----- IP..KA.AKH FSNNGNRS. DCI.K... T...D.EQ.SIV -----GDN LGE...C.IK S.H..KCY.. 453
TnilC .....APS KG.AK.G... .GD----- TP..RA.AKY FSSGINKRS. DCI.K... T...D.EQ.IM -----GDN LRE...H.IK S.H..KCY.. 453
OlaiCb .....W.....PL .G.K.G... .GD----- VP...I.KEH FSSGINKRS. DII.K... T...D.AQ.MK -----GD. .TGN..R.K S.H..KCY.. 453
OnilCa .....L.G.K.G... .GD----- IP...M.KQY FSSGINKRS. D.I.R... T...D.EQ.MR -----GD. .GN..S.K S.H..KCY.. 451
GaclC .....PQ .G.K.G... .GESFRP-- VP..F.M.ERH FSSGINKRS. DCI.R... T...D.EQ.MR -----G... .GN..R.K S.H..KCY.. 456
TrilC .....K.....PQ .G.K.G... .GDR----- IP...M.KQY FSSGINKRS. DVI.K...I T...D.EQ.MR -----G... .GN..R.K S.H..KCY.. 454
DrelC .....PS .G.K.G... .GN----- TP...R.KQF FSSGINKRS. DCI.K... T...DQAE.MK -----G.N. .SEN..R.K S.H..KCY.. 451
DrelB .....K.EPQ .G.LK.PS... .GN----- VP...R.LKY FSEGIVNRAS. .I.T...L T...D.AH.YD -----PDN I-R...L.K S.H..KCY.. 449
OnilB .....N.T.EPQ .G.LK... .GY----- IP...A.IKY FS.GLNKVS. D.I.S...L T...D.Q.YD -----PAK S-N...S.K S.H..KCY.. 449
GaclB .....N.T.EPQ .G.LK... .GH----- VP...S.IKY FG.GVNKVS. D.I.S...L T...D.Q.YD -----PAK A-K...S.K S.H..KCY.. 449
OlaiB .....N.TTEPQ .G.LK... .GN----- VP...A.IKH FSHGNKTS. D.I.S...L T...D.SQ.YD -----GDK K-N...S.K S.H..KCY.. 449
TrulB .....N.T.EPQ .G.LK... .GN-----Q- VP...R.SKY FS.GLNKVS. D.I.S...L T...D.Q.YD -----QAR S-R...S.K S.H..KCY.. 450
TnilB .....S.T.EPQ .G.LK... .GN----- VP...A.AKY F.GLNKVS. D.I.S...L T...D.Q.YD -----HAR S-R...S.K S.H..KCY.. 451
HsalB .....PS .G.K... .GD----- VE...A.QAF FSSGNKA.. .I.R... A..E.SYSYD -----P..E...SL.GK ..H.NCYN. 451

MmulB .....PQ .G.K..... .GG----- VE..EA.QTY FSSGKNKMS. D.I.R..... T..EDSHCYN -----PD. E-T..SL.GK ..H.NCYN. 451
Mdo1B .....PQ .G.K...F.. .GG----- VQ..EA.QTY FNTGKNKAS. .I.K..... T..E.SH..D -----P.N E-...SL.GK S..H.NCYN. 451
ShalB .....TC.IQ .G.K..... .GG----- VQ..EA.QTY FNTGKNKAS. .I.K..... T..E.SH.YD -----P.. E-...SL.GK ..H.NCYN. 451
AcalB .....PE TG..R..... .GE----- LP..EA.EKY FSRGKNKAS. DC..R..... T..E.EH.FD -----PDK E-D...R.SK S..H.QCCY. 450
FpelB .....PQ .G.R..... .GE----- VP..EA.ARF FSHGKNKVS. D.I.R..... L T..E.EH.YV -----AGK E-GCM.T..K S..H.QCY.. 449
XtrlB Y...S..PQ .G.K..... .GN----- VH..A..NF FSNGLNRT. SC..R.V..I ..E.E..YN -----E.. K-S..S..SK ..H.NCYN. 449
LchB .....KIIT.YIK YERKGSVRIS LSC----- IP..KA.SEF FSHGKNKIS. T.I.R..... M T..D.EQAYD -----K.N .-TT..S..K S..H.KCF.. 406
Dm E..KKGATPV EG..... .WN----- SK..EA.NTF FSWGVNQT.S. RTI.S...VL ..D..FEFD -----LAR .-EL..NFGK K..H.N.YN. 449
ci S..N.T..P. EG..... .GE----- IP..KA.NTY FVDGVNKK.S. H.I.K...IL V..D.EHVVS -----D.. S-...SK.GR S..H.KCYN. 443

HsalC WFDKSFLLIV FSNGLGLSV EHSWADCPIS GHMWEFTLAT ECFQLGYSTD GHCKGHPDPT LPQPQLQWD LPDQIHSSIS ----LALRGA KILSENVDC 544
SSc1C .....S..I .....A..... .....A..... .....S..... .....H..... .....K..L... -----QA.A..I... 551
MmulC .....V..... .L..... .A..... .....E..QP... -----T..G.I... 543
HsalA .....FV..K..M..NA .....A.V A.L..YVMSI DSL...AE. ....DIN.N I.Y.T... I.GECQEV.E -----TS.NT. NL.AND..F. 547
MmulA .....I.FV..K.S.I..INA .....A.V .L..YVM. DV.....E. ....DKN.N I.K.T... I.GECQEV.E ----TS.SS. SF.AND..L. 547
Mdo1A .....T..F..K..M..NA .....A.V .L..YVM. D.....TE. ....DTN.N I.Y.T... I.EECQDV.E -----ES.SL. ST.AND..F. 547
GgalA .....T..V..K..M..NA .....A.V .L..NVM. .YLE..LE. ....DTNQ I.I.TK... I.EECQDV.E ----RS.ST. RA.ADD..FY 547
FpelA .....T.....K..RI..NA .....A.V .L..NVM. .YLE..LE. ....DINQN I.I.TK... I.AECQEV.E ----RS.ST. IA.ADD..FY 547
AcalA .....K..M..NT .....A.V .L..NVMFS D.LE..TE. ....ESSG ILM.S... ILEECQEV.E ----RS.AV. RP.ADD..F. 547
XtrlA .....TMSFV..K..M..MN. ....A.V .L..YVM. DKME..NE. ....DVNGN I.P.S... I.EECQVVE -----S.TV. .A.ADD..F. 548
LchlA .....LSFV..K..M..NA .....A.V .L..YV. DS.....TEE. ....E.K.S I.F...R.E I.EECQEV.E ----IS.KV. .A.ADD..F. 546
Ler1A .....LSF.I..K..I..NA .....A.I .L..YV... DQ.....TDE .N..E.N.Q IQP..... ILEPCQEV.H ----RS.SV. QQ.ADD..F. 544
XtrlC .....F..K..I..NA .....A.V .....V... D.....NEE .N..QV.SN .V..... ISEECQEV.Q ----SS.AV. QA.ADD..F. 546
Ler1C .....F..A..V..NA .....A.I .L..YA... DT.....KE. .N..D.A.N V.L..... I.KECQEV.M ----SS.KV. QT.AND..FY 547
CmilC .....E..V..NA .....A.I .L..YV... DS.....NDQ .....DAES. VLS..... I.EACQEV. ----GS.KV. QS.AND..F. 547
AcalC .....YR..S..NA .....A.V .L..YC... DA.T...DAY .N..DM..N V.P..K... I.PECEAV.M ----QS.F.V. YN.ASDI.F. 546
LchlC .....V..K..TM..NA .....A.I .L..YV... DT..I..KP. ....EA.S. ILP..... I.AECREV.K ----MS.AV. QT.AND..F. 545
TnilA .....N..K..TM..NA .....A.V .L..QV.SM DPKN..TE. ....R.A.H.N .G..... ISTECCQV.Q ----SS.TV. QK.ADD..S. 548
TrulA .....N..K..TM..NA .....A.V .L..HV.SM DPNN..TEE. ....R.V.H.N .G..K... I.AECQV.Q ----NS.TV. QN.ADD..S. 550
OnilA .....LNM..K..TM..NA .....A.V .L..HV.SM DP..K..TE. ....V.K.H.N .G..... T I.AECQEA.E ----SS.TV. RA.ADD..S. 546
Gac1A .....N..I..YK..TM..NA .....A.V .L..HV.SM DPIK..TEA. ....E.H.N .G..K.S. I.AECQEV.Q ----SS.KV. RT.ADD..S. 548
DrelAa .....LN..K..TM..NA .....A.V .L..QV.SS DPVR..TEE. ....N.H.N M.G..... I.EECQTV. ----SS.KV. NT.ADD..M. 547
TfulA2 .....N..I..K..TM..NA .T..A.V .L..HV.SM DPIT..TE. ....R.K.H.N .G.L... ISVECQ.V.R ----SS.KV. NA.ADD..M. 547
DrelAb .....IN..I..K..TM..NA .....A.V .L..QV.SM DPVK..TE. ....E.HAN .G..... N I.TECQTM.T ----NS.SV. EA.ADD..S. 552
TfulA1 .....N..I..YK.ATI..NA .....A.I .L..NV.S. DAIK..TD. ....A.QTHN .G..... N I.PECQTM.A ----NS.SV. QA.ADD..MV 548
OlalCa .....SV.Y..K..S..ING .....A.VV A.V..YV... DS.....NEE .....EV.AS .....K.N.E ISPECEEQ. ----RS.AV. QA.ADD..F. 547
OnilCb .....VVY..K..N..INA .....A.VL A.V..Y..N DS.....NAE .....DV..S .R.VK.S.E I.PECEEQ.A ----QS.AV. QA.ADD..F. 548
Ame1C .....SVVI..K..N..NA .....A.V S...YV... DS.....NEE .....DVN.S .....T... I.K.CQEQVA ----QC.AV. QP.ADDI.F. 547
Gac1C .....SVVY..K..M..NG .....A.VL S.A.QYV.T. D.....NAE .....EV.SS .G..K.N.E I.PECEEQ. ----GS.AV. QA.ADD..V. 550
TrulC .....SVVF..YK..S..NG .....G.A.VL T.L..Y... .....NAE .....EV.AS .AE..K.N.E ISSECEEQ. ----QS.EV. QA.AND..M. 549
TnilC .....SVVF..YK..S..NG .....G.A.VL S.L..Y... .....NAE .....EV.AS .K..K.N.E I.SCEEQ.C ----QS.AL. QA.AND..M. 549
OlalCb .....SIVI..YK..S..NA .....A.TV A.L..Y... DA...TE. ....EV.RS .P.H..S.E I.SEVQD.F ----SS.TL. .A.ADD... 549
OnilCa .....SVVI..YK..S..NA .....A.TV A.L..Y... DA...TE. ....EVE.S .....V.N I.AEVQAQV. ----SS.AV. QA.ADD... 547
Gac1C .....SIVI..YK..S..NA .....A.TV A.L..Y... DA...TE. ....DV.RS .P...A... I.SEVQAQV. ----SS.AV. QA.ADD... 552
TnilC .....SIVI..YK..S..NA .....A.TV A.L..Y... DA.H..TE. ....EVE.L .H...L... I.LECNTQV AQCCSS.VV. QA.ADD... 554
DrelC .....SVV..YK..N..NA .....A.V A.L..Y... DT.H..NS. .N.R.DV.HS .H...S... I.FEVQTV. ----ES.AV. QA.ADE... 547
DrelB .....N..YK..M.VNT .....S..I .L..YV... D.H..TAE .....DVNK .AP.T... I.KACQEI.E ----GSY.I. .GIADD..F. 545
OnilB .....S..YK..M.VN. ....A.V .....YI... D.H..TEE .....DVNKN .H.T... Q I.NECQNV.E ----TSYLS. .QIADD..F. 545
Gac1B .....S..YK..M.VN. ....A.V .....YV... D.H..TEE .....DVNKG .H.S... Q I.NECQEV.E ----TSYLS. .LIADD..F. 545
OlalB .....S..YK..M.VN. ....A.V .....YV... D.H..C..EE .....DANRG .F.T... Q ISKECQDV.E ----ASYLS. .KIADD..F. 545
TrulB .....S..YK..M.IN. ....A.V .....YV.S. D.H..TEE .....DVNKG .Y.S... Q I.VECK.I.E ----ASYVS. .RIADD..FY 546
TnilB .....S..YK..M.IN. ....A.VV .....V... D.H..TEE .....DVNKG .Y.S... Q I.VECK.I.E ----ASYVS. .QIADD..F. 547
HsalB .....S..K..Q..NA .....A..A.I .L..V.G. DS.H..TET .L.K.N.A .AP.T... I.K.CQAV.E ----SSYQV. .A.ADD.ELY 547
MmulB .....S..CK..L..NT .....A..I .L..V.G. DT.H..TET .V.E.NT. .P...P... I.E.CREA.E ----NSYQV. .A.ADD.ELY 547
Mdo1B .....N..S..K.A..NT .....A.V .L..V... DA.H.D.TDA .Q.K.NHS .AP...L... I.EECQLE.E ----SSYQV. .T.ADD.ELY 547
ShalB .....VA..K..NT .....A..A.VV .L..V... DA.H.D.NES .Q.K.NHS .AP...E I.EECQLE.E ----SSYEV. .A.ADD.ELY 547
AcalB .....S.V..YR...ANA .....A..I .L..M... DH...CS. .H.V.NTA .P...T... I.EECCNV.D ----ASYAV. RA.ADDI.F. 546
FpelB .....V..YK...ANA .....A..I .L..A... .K...TDR .R.E.NTO .AP... I.QCRDTE.E ----SSY.L. .A.ADD..FC 545
XtrlB .....S.V..R...NA .....A..I .L... D.E..TE. .N.R.DAGSP .P.Y... I.PKCRVE.E ----RSYVT. .AIADD..F. 545
LchB .....F..K...INT .....A..VI .L..V... D.E.S.TES .EMNKK .P...T... .EBCKEQ.Q ----QSYKV. .A.ADD.NFC 502
Dm .....C..VC. GT..RV.FNA .T.S.AA.A S...NLIVD DLVSD..DET .NT..T.AFO P.T.P.T... .KP-CLAQ.E ----E.TIDV TK.INE.NLC 544
ci .....T.NC..K..RW.INA .....A..M SYVV.EA.GF .YQS...TQ. .RV..R.TVQ PIT.H...Q .TPCEQEV.E ----TS.SV. NN.ADD.HLN 539

HsalC VVPFSLFGKS FIRCHLSSD SFIQIALQLA HFRDRGQFCL TYESAMTRLF LEGRTETVRS CTREACNFVR AMEDK---EK TDPQCLALFR VAVDKHQALL 641
SSc1C .....F..H..... .K..... .T..... .R..... .....S..... .HQ----- L..... 648
MmulC .....F..H..... .K.C.V... .LV..... .....Q..... .DN-----E .QH..... 639
HsalA SF..VA...G I.KK.RT.P. A.V.L... .YK.M.K... .AS... R..... .T.S.D... .V.P---AQ .VE.R.K.K.L SE...HMY 644
MmulA SF..DT...G L.KK.RT.P. A..L... .YK.M.K... .AS... R..... .T.S.L... .M.P---TT .AE.RFK.K I.CE...H.Y 644
Mdo1A SF..DA...E L.KKSRT.P. A.V.L... .YK.M.K... .AS... R..... .M.S...L .VNP---TE SVENK.K.L I.AE...HMY 644
GgalA SFY.DV...G L.KKAKT.P. A..L... .Y.M.K.K.S. .AS... R..... .I.S...Q T..NP---SE SNEKNMKS. L.AT...H.Y 644
FpelA SFF.DA...G L.KKAKT.P. A.V.L... .Y.M.K.K.S. .AS... R..... .V.S...T .P---TE SSENK.KF.. I.AA...H.Y 644
AcalA SF..DT...G LMKKAKT.P. A.V.L... .Y.M.K.K... .AS... R..... .TQS.K.K .D.P---SE .LEKKI..K A.ATH..L.Y 644
XtrlA SF..NS...G L.KKSRT.P. A.V.LS... .Y..KEK... .AS... R..... .I.S.D.L .S.P---SQ .NEKR.Q.K E.AE...QMY 645
LchlA SF..DS...G L.KK.RT.P. A..L... .Y.W.K.K.Y. .AS... R..... .V.S...L S.V.P---KQ .NE.R.K.K I.SE...NMY 643
Ler1A SF..DK...G V.KK.WL.P. A.V.M... .Y..K.K... .AS... R..... .SQSTQ..L .VNS---SQ .NEEK.K... L.A...SMY 641
XtrlC TF..K...G L.KK.RT.P. A..... .Y..K.K... .AS... R..... .MNP---SQ .NEER.K... L.AE...M.Y 643
Ler1C AF..TR...G V.KK.RT.P. A..... NY..K.T... .S... R..... .V.T...T .LDG.---KH SNEE..N... I.AKN..HIS 644
CmilC TF..TK...G L.KK.RT.P. A..L... N..K.K... .S... R..... .IQSS... .H---L SASE..K.H L.AKT..HIS 643
AcalC AFT.KD...G L.KK.RT.P. G..L... .KKK... .AS... R..... .I.S...K .M.P---TQ .SAR.H... .AE...N.Y 643
LchlC .FT.KD...G L.KK.RT.P. A..... .Y..K.K... .AS... R..... .S.S.A.K .V.A---GY .NAAR.K.K .AE...QMY 642
TnilA II..E...G K.KK.RT.P. A..... .Y..K.K... .AS... R..... .V.S.A... S.IRD---E .TEER.R.LK K.AE...N.Y 644
TrulA II..E...G K.KK.RT.P. A..... .Y..K.K... .AS... R..... .M.S.A... S.IRD---E .TEER.R.LK K.AE...N.Y 646
OnilA II..TD...G L.KK.RT.P. A..... .Y..K.K... .AS... M... R..... .I.T.A... .VGD---E .REER.R.LK L.AE...N.Y 642
Gac1A IM..D...G L.KK.RT.P. A..... .Y..K.K... .AS... R..... .S.S.A... .IKG---E .RDE.R.LK Q.AE...NMY 644
DrelAa IF..ND...G L.KK.KT.P. G..L... .K.K... .AS... R..... .N.T.A..H .M.E---KA .REER.K.LK A.AE...N.Y 644
