# Supplementary material for: The Origin and Diversity of Cpt1 Genes in Vertebrate Species
Source: PubMed Central journal article supplement (PMC4589379; doi:10.1371/journal.pone.0138447), 2015-09-30
Supplement: pone.0138447.s002.pdf [file pone.0138447.s002.pdf]

**Supporting information 2 Fig: MAFFT Sequence alignment without gaps**

|        |             |              |              |             |                |             |             |             |             |                |     |
|--------|-------------|--------------|--------------|-------------|----------------|-------------|-------------|-------------|-------------|----------------|-----|
| Hsa1C  | LRSWKRSRFV  | NDFLTGVFPA   | SPLSWLFLFS   | AIQLAWLFLQ  | DPSLGLMEKI     | KELLPDWRLA  | AALFASCLWG  | ALIFLLEPHG  | AMSSPTKTWL  | ALVRFISGRH     | 100 |
| Ssc1C  | .....I..... | .....C.....  | .....C.....  | .....C..... | .....C.....    | .....C..... | .....C..... | .....T..... | .....V..... | .....S.....    | 100 |
| MmulC  | .....W.V.   | .....A.V.    | .....T.....  | .....T..... | .....CL.....   | .....Q.S.   | .....V..... | .....T..... | .....V..... | .....N.....    | 100 |
| Hsa1A  | .H..KI..K   | .GII..Y.     | .S...IVVV    | GVMSTMYAKI  | ....IIA..      | NRT.ETAKVS  | GV..GTG..V  | ..VMFTE..   | K..RA..I    | M GM.K....K    | 100 |
| MmulA  | .H..KI..K   | .GII..Y.     | .S...IVVV    | GVISSMHTKV  | ....MIA..      | NRT.DTTKVS  | GV..GTG..V  | .I.MFPAE..  | K..RS.RI    | M .M.KV....K   | 100 |
| MdolA  | .H..KI..K   | .GII..Y.     | .S...IVVV    | GVMSTMYAKV  | ....IIA..      | NQT.DMTKVS  | GI..GTG..V  | T..VMFAEY.  | KL.RG.RI    | M GM.K....K    | 100 |
| GgalA  | VH..KI..K   | .GII..Y.     | .S...IVVV    | GVMSTMYAKI  | ....IIA..      | NRT.DTTQVS  | GI..GTG..V  | ..VMFAE..   | KL.AG..L    | M T..KL....K   | 100 |
| FpelA  | VH..KI..K   | .GII..Y.     | .S...IVVV    | GVMSTMYAKI  | ....IIA..      | NRT.DTTQVS  | GV..GTG..V  | ..VMFAE..   | KL.AG..F    | M .KL....K     | 100 |
| AcalA  | .Y..KI..K   | .GII..Y.     | .S...IVVV    | GVMSTMYAKI  | ....IIA..      | NRT.DITQVS  | GV..GTG..V  | ....MFPAE.. | KL.TG..I    | M T..KL....K   | 100 |
| XtrlA  | .H..KI..K   | .GI.....     | .S...IVVV    | GVTSSMYTKV  | ....F.II..     | NNA.SATQVS  | GV..GTG..V  | S..AMF.E..  | KL.AS.RI    | M GM.KLL...K   | 100 |
| LchlA  | .H..KI..K   | .GII..Y.     | .S...VVV     | GVVSTMYTRV  | ....MIAR.      | SQR..VTQVS  | GV..GTG..V  | .F.MFIE..   | KVPFG.RI    | I R..KL..VCK   | 100 |
| Ler1A  | ....KR.YK   | .GI.....     | .S...VVV     | VIATMYARV   | ....MI..       | RCH..TNE.S  | GL..STG..I  | .V.MFV..    | KTPTS.V     | L.M LI.K....K  | 100 |
| XtrlC  | ....KA.VK   | .S.I.....    | .S...VVVI    | .MGTLYARV   | ....M.MI..     | ..H..ASQVS  | .L..STG..F  | ..MMY.Q..   | K..AT..L    | ..S..K....N    | 100 |
| Ler1C  | I...KN.IK   | .N.M...Y.    | .S...IVVL    | TVVGTMYTRV  | ....M.IAML     | R.HI.LRQVS  | .M...TG..L  | ....MF.E..  | KV..T..V    | F T..K....K    | 100 |
| CmilC  | V..A..KA    | .IR NIV...Y. | .S...IVVL    | TVVGTMYTRV  | ....M.MIG..    | ..H..VKQMS  | .L..TV..L   | ....YMF.E.. | KA.NM.RI    | F TM.K....K    | 100 |
| AcalC  | V...KNQLR   | .G.V...Y.    | .S...MVT     | .LVTQYSR.   | ....M.MID..    | ..H..VSM.S  | ..T..STV..L | ....MMY.E.. | K..NT..I    | ..S..KM.A..K   | 100 |
| LchlC  | Q...KA.LK   | .S.I..MY..   | .S...VI      | ..MATLYARV  | ....M.MID..    | ..H..VKI.C  | TN.YQCGIYS  | EILLMF.Q    | N RV.LT..I  | I T..K....K    | 100 |
| Tn1A   | .H..KI..K   | .GVM..Y.G    | ..AGFMIVVG   | SYMSNKYNR.  | ....M.VV.L     | GQYI.IGQVG  | GV..VGTG..V | TI.MMH.R    | SV.WTSRA    | M L..KV....K   | 100 |
| TrulA  | .H..KI..K   | .GVM..Y.G    | ..GGFMIVVG   | SYMSNKYN..  | ....M.FVV.L    | GQYI.ISQVG  | GV..VGTG..V | TI.MMY.R    | SI.WTSRA    | M L..KV....K   | 100 |
| On1A   | IH...KV..K  | .GIM..Y.G    | ..AGFSIVVG   | SYMANK..K   | ....M.FT.L     | GQHI.ISQVG  | GI..VGTG..V | TI.MMQ.R    | SL.WSSRI    | M V..KV....K   | 100 |
| Gac1A  | .H..KI..K   | .GVM..Y.G    | ..GGFMVIVV   | SYMSNKYQ..  | ....M.IA.L     | GQHM.ISQVG  | GV..VGTG..V | SI.MMYTS..  | SVAWS.RL    | M V..KV....K   | 100 |
| DrelAa | IH...KI..K  | .GVM..Y.G    | ..SGLVVVLV   | GYMSTKYAKI  | ....ILT.L      | STH..VSQVG  | GV..VGTG..I | .VT.MFNQ..  | TL.LK..I    | .S..V..KL..PK  | 100 |
| TfulA2 | .H..KI..K   | .GVM..Y.G    | ..TGL.GVVG   | GYLITKYANI  | ....T.VVA.L    | APH..VCQVG  | GI..VGTG.V  | V..MYNR..   | T..IR..I    | ..S..KL..PK    | 100 |
| DrelAb | IH...KI..K  | .GI..N..Y.G  | ..APGFVLVLA  | GYLQ.YY.KV  | ....M.LF.L     | GNYV.ISQVG  | GVMVGTG..I  | .I..MFAS..  | R.TWKIRL    | ..V.F.KV...QT  | 100 |
| TfulA1 | .H..KI..K   | .GIM..Y.G    | ..APGLMLVLA  | GVMG.KYA.V  | ....M.VFR.     | GKYV.ISQVG  | GI..VGTG..V | VI..MR.R    | SLTWQ.QI    | .S..V..KV...MK | 100 |
| OlalCa | V...KL.IK   | .SVI...Y.    | .S...VVVI    | .LATMYTRS   | ....M.IIA..    | Q.H..VSQVS  | .V..STM..L  | ..MF.Q..    | K..TT..I    | V.....K        | 100 |
| On1Cb  | M...KV.VK   | .SVI...Y.    | .S...VVVI    | .LATMYTRS   | ....M.IA..     | Q.H..VSQVS  | .V..STM..L  | ..MF.Q..    | K..TT..I    | V.....K        | 100 |
| AmelC  | ....KV.LK   | .NVI...Y.    | .S...VVVI    | .LATMYTRS   | ....M.IA..     | Q.H..ASQVS  | .V..STM..L  | ..MF.Q..    | NV..T..V    | V M.....Q      | 100 |
| Gac1C  | V...K.IK    | .IGLK.SV     | ..V.VV       | .LATMYTRS   | ....M.IA..     | Q.H..RPYS   | .S.AVTM..L  | ..MF.K..    | K..NT..V    | V VS.ASHPS.K   | 100 |
| TrulC  | VN...KI.IK  | .SVIR..Y.    | .F...VVVI    | .LATMYTRS   | ....M.IA..     | Q.N..VSK.S  | .VI.STM..L  | ..MF..      | K..TT..V    | V.....K        | 100 |
| Tn1C   | VH...KI.IK  | .SVIK..Y.    | .F...VVVI    | .LATMYTRS   | ....M.IA..     | Q.N..VSK.S  | .VI.STM..L  | ..MF..      | K..TT..V    | V.....K        | 100 |
| OlalCb | V...K..MR   | .RVIK..Y.    | .S...VVAI    | G.LATIYM.S  | ....M.IAB.     | QOR..LSQVS  | .LV.STL..L  | S..LMF.Q..  | RV.NT..V    | V T.L.LL...K   | 100 |
| On1Ca  | V...K..VR   | .SLIK..Y.    | .S...VVAI    | G.LATIYM.S  | ....M.IT..     | QOH..LSQVS  | .LV.STL..L  | S..LMF.Q..  | RI.NT..V    | V P..LL.S.K    | 100 |
| Gac_0  | V...K..MR   | .RVIK..Y.    | .S...VVVI    | .LATMYMRS   | ....M.IKM.     | QOH..LRQS   | .LV.STL..L  | S..LMF.Q..  | RV.NT..V    | V T.L.LL.S.K   | 100 |
| TrilC  | V...K..VR   | .SLIK..Y.    | .S...VSI     | .LATMYMRS   | ....M.IT..     | QHH..LSQ.S  | .LV.STL..L  | S..LMF.Q..  | RV.NF..V    | V T.LGLL.S.K   | 100 |
| DrelC  | ....K..IK   | .RIIK.AY     | .S...IVI     | .LATMYM.S   | ....M.IA..     | Q.H..LSQS   | .L..STM..M  | S..LMF.Q..  | H..TK..V    | A T..KLL.S.K   | 100 |
| DrelB  | VT...K.I.K  | .SV...Y.     | .S...VVVI    | .MSTMYARI   | ....M.TID..    | ..TS..VSQS  | .I..TG..L   | SV..IF.S.   | K..YS..V    | .S..KLL...R    | 100 |
| On1B   | VTA..KIQ.K  | .GV.A..Y.    | .S...IVVI    | MMSSLYIHI   | ....M.DA.      | ..N.YR..S   | .I..TG..L   | F..YIF.S.   | K..TS..V    | C..KM...R      | 100 |
| Gac1B  | VTA..KIQ.K  | .GV.A..Y.    | .S...IVVI    | MMSSLYIRI   | ....M.AL       | Q.N..HR..S  | .I..TG..L   | F..YIF.S.   | K..RS..V    | S..KM...R      | 100 |
| OlalCa | .TV..KIQ.K  | .SV..Y..Y.   | .S...IVVI    | MMSSLYTNT   | ....M.IDA.     | ..N..HR..S  | .I..GTG..L  | F..YIF.S.   | K..S..L     | .Y..KM...R     | 100 |
| TrulB  | .TA..KIQ.K  | .GV.A..Y.    | .S...IVVI    | MMSSLYTRV   | ....M.IAM      | ..N.YR..S   | .I..TG..L   | F..YIF.S.   | K..TS..V    | T..KM...R      | 100 |
| Tn1B   | .TA..KIQ.K  | .GV.A..Y.    | .S...IVVI    | MMSSLYI.V   | ....M.IAM      | ..N.YR.VS   | .I..TG..L   | F..YIF.S.   | K..TS..V    | T..KM...R      | 100 |
| Hsa1B  | IN...KI.IK  | .GI.R..Y.G   | .T...VVVM    | TMGSS.CNV   | ....I...VSC.   | QRC..QG..S  | M.I.STGV.V  | TG..MF.M.   | KT.NL.RI    | A MCI.LL.S.    | 100 |
| MmulB  | IN...KI.IK  | .GI.R..Y.G   | .T...VVVM    | TVGSSYCKV   | ....I..M.VDC.  | QRC..ERE.S  | MVI.STGV.A  | TG..MF.M.S  | KT.HA..I    | A IC..LL.S.R   | 100 |
| MdolB  | IN...KI.IK  | .GI.R..Y.G   | .T...VVVM    | TMGSSYCNV   | ....I..M.MICC. | RKYI.EG.IS  | VGI.STGV.V  | TG..MF.M.   | QT.RT..I    | A IC..LL.N.R   | 100 |
| ShalB  | IN...KI.IK  | .GI.R..Y.G   | .T...VVVM    | TMGSSYCNV   | ....I..M.MICH. | RKYI.EG.IS  | VGI.STGV.V  | TG..MF.M.   | QT.RT..I    | A IC..LL.N.R   | 100 |
| AcalB  | VS...KA.LK  | .S.I...G     | T.SG..AVVA   | VTVG.TYFGI  | ..V.V.IFR.     | QKR..NS.S   | .LI.S.GA.M  | LGVLMF...   | KTRPS..I    | A SM..VM...100 |     |
| FpelB  | IS...KV.AK  | .S.I...G     | T.S.MVVVM    | TAGSFYCV    | ....M.MIAR.    | RHC..ES.VS  | TVI.STGA.L  | SAVLMF...   | K.RS.RI     | V .MKVL.I.K    | 100 |
| XtrlB  | .VACRKITLK  | SSV.S..Y.    | ..ST.FAVVA   | MTLGSLYGK   | ....I..T..     | NSI..GK..S  | .VI.S.GV.V  | SG.LMF..K   | KT.MK..I    | A GCMK.M.S.Q   | 100 |
| LchlB  | .MN.LHVFQ   | .SL...Y.     | .S...VVVV    | TIGTRYVKM   | ....I.IDY.     | RSAR.RS.S   | .T..TGV.V   | TG.LMF...   | STRIR.RI    | A T..K....100  |     |
| Dm     | V...KA.AR   | .GVRN..Y.    | ..HIQ.LWLISA | IALGLH.AGY  | QAQPFN.TNR.    | LVH..SNWT.  | CF.A.LVV.L  | SIC.MV.SRS  | RV.L..ML    | V .V..VL.SNK   | 100 |
| ci     | V...RKT..R  | .RV.S...V    | KYT.LVG.TA   | IVL..S..SY  | ..ITW.FKNNR    | TNII.PRNTS  | YLVSSTL..L  | LAVLMF..R   | K..LK..L    | A SYLQLLCYTQ   | 100 |

|        |             |             |              |               |               |              |             |             |                |              |     |
|--------|-------------|-------------|--------------|---------------|---------------|--------------|-------------|-------------|----------------|--------------|-----|
| Hsa1C  | PMLFSYQRSL  | PRQPVPVQD   | TVRKYLESVR   | PILSDEDFDW    | TAVLAQEFRL    | LWYLRLKSWW   | ASNYVSDWWE  | EFVYLRSRNP  | LVNSNYMMD      | FLYVTPPLQ    | 200 |
| Ssc1C  | .....A..... | .....A..... | .....V.CE..E | ISA..R..K     | ...Q..Y..     | .....S.....  | .....S..... | .....S..... | .....N.....    | .....V.....  | 200 |
| MmulC  | .R...F.A.   | .....A.E    | .....V.GD.A  | R.ATA..ND..   | ..L.Q...C     | T.....T..... | .....T..... | .....G..... | .....I..T..... | .....S.....  | 200 |
| Hsa1A  | ..Y.F.T.    | ..L..A.K    | ..NR..Q...   | ..LMKE..KR    | MTA..D.AV     | ..G..K....   | ..T.....    | ..YI..G.G   | .....I..A      | ..L..L..HI   | 200 |
| MmulA  | ..Y.F.T.    | ..L..A.K    | ..SR.....    | ..LMKEG..QR   | MTA..D.AV     | ..N..K....   | ..T.....    | ..YI..G.G   | .....I..A      | ..E.M..I..HI | 200 |
| MdolA  | ..Y.F.T.    | ..L..A.K    | ..NR.....    | ..L.NKDN.QR   | MKG..ED.ST    | ..N..K....   | ..T.....    | ..YI..G.G   | .....I..A      | ..L..L..TI   | 200 |
| GgalA  | ..Y.F.T.    | ..L..A.K    | ..NR.....    | ..LMN..E.KR   | MEG..KD.AF    | ..N..K....   | ..T.....    | ..YI..G.G   | .....I..A      | ..HLS..TI    | 200 |
| FpelA  | ..Y.F.T.    | ..L..A.N    | ..NR.....    | ..LMD..E.RR   | MEG..KD.AF    | ..N..K....   | ..T.....    | ..YI..G.G   | .....I..A      | ..LS..T.     | 200 |
| AcalA  | ..Y.F.T.    | ..L...KN    | ..NR.....    | ..H.LMNE.Q    | KR.MEA.GKD.AT | ..N..K....   | ..T.....    | ..YI..G.G   | .....I..A      | ..F..F..SV   | 200 |
| XtrlA  | ..Y.F.T.    | ..L..P.K    | ..KR..D..K   | ..LMDK.K.ER   | MEG..KD.AN    | ..N..K....   | ..T.....    | ..YI..G.G   | .....I..A      | ..L..HI      | 200 |
| LchlA  | ..Y.F.T.    | ..L..A.K    | ..MTR.....   | ..LMD..Q.RR   | MTK..KD.EL    | ..K..K....   | ..T.....    | ..YI..G.G   | .....I..A      | ..L.....     | 200 |
| Ler1A  | ..LTY..F.T. | ..L..T.K    | ..M.....     | ..L.N.KE.QR   | MQA..KD.EL    | ..K..K....   | ..T.....    | ..YI..G.G   | .....I..A      | ..Y..IV..V   | 200 |
| XtrlC  | ..Y..AV     | ..L..G.KE   | ..QR..D..    | ..LMN..EYKR   | MTG..KD.EV    | ..N..K....   | ..T.....    | ..YI..G.G   | .....I..A      | ..V.....     | 200 |
| Ler1C  | ..Y.F.N.    | ..L..P..    | ..L.RF.....  | ..LMN...RR    | KA..KD.E      | ..N..I.....  | ..T.....    | ..Y..QG.E   | .....I..A      | ..TS.....    | 200 |
| CmilC  | ..Y.F.A.    | ..L..TI..   | ..MQR.....   | ..LMN..E.HR   | MEA..KD.EV    | ..K..K....   | ..T.....    | ..Y...G.E   | .....I..A      | ..I.....     | 200 |
| AcalC  | ..Y...A.    | ..L..ALK.   | ..MQ...I..   | ..LTT.AE.QR   | M.A..RD.EQ    | ..T..K....   | ..T.....    | ..Y...G.G   | .....I..A      | ..I..V..V    | 200 |
| LchlC  | ..Y...AC    | ..L..PIAK   | ..MQR.....   | ..LMD..K.KR   | MTA..KD.EV    | ..N..K....   | ..T.....    | ..YI..G.G   | .....I..A      | ..I.AS..YI   | 200 |
| Tn1A   | ..Y.F.N.    | ..L..DIS    | ..C.RH.....  | ..ALMD..Q.ER  | MTA.TKD.EK    | ..N..K....   | ..T.....    | ..YI..G.G   | .....I..A      | ..I.SI       | 200 |
| TrulA  | ..Y.F.N.    | ..L..A.S    | ..C.R.....   | ..H.LMDE.R.ER | MTA..KD.EK    | ..N..K....   | ..T.....    | ..YI..G.G   | .....I..A      | ..F..SI      | 200 |
| On1A   | ..Y.F.N.    | ..L..IK     | ..CER.....   | ..LMD..QQ.ER  | MKG.T.D.EK    | ..N..K....   | ..T.....    | ..YI..G.G   | .....I..A      | ..F..SI      | 200 |
| Gac1A  | ..Y.F.N.    | ..L..IK     | ..CKR.....   | ..LME..QYQR   | MEG.TKD.EK    | ..N..K....   | ..T.....    | ..YI..G.G   | .....I..A      | ..F..SI      | 200 |
| DrelAa | ..Y.F.S.    | ..L..P.K    | ..R...A..    | ..LMD..QYKR   | MEG..KD.EK    | ..N..K....   | ..T.....    | ..YI..G.G   | .....I..A      | ..N.S..      | 200 |
| TfulA2 | ..Y.F.S.    | ..L..P.EH   | ..KR.....    | ..LMD..QYKR   | MEA..KD.QS    | ..N..K.AF    | ..T.....    | ..DY..V.G.G | .....I..A      | ..F..H..     | 200 |
| DrelAb | ..Y.F.N.    | ..HLF...KE  | ..T.R...Q    | ..L...EHQR    | MQR..LD.E     | ..N..K....   | ..T.....    | ..YI..G.G   | .....I..A      | ..AF..NI     | 200 |
| TfulA1 | ..N.Y.F.T.  | ..NL.L..K   | ..MKR.....   | ..L.D.TEYKK   | MEE..SD.QK    | ..T..K....   | ..T.....    | ..YI...G.G  | .....I..A      | ..H.L.H.     | 200 |
| OlalCa | ..L.Y..G.   | ..NL...AIK  | ..KR.....    | ..L.MD.BEYER  | MTK..T..ES    | ..S..K..AL   | .....T..... | ..Y...G.G   | .....I..A      | ..I.....     | 200 |
| On1Cb  | ..L.Y..G.   | ..NL...TIK  | ..KR.....    | ..LMD.KEYER   | MTK..A..ES    | ..S..K..AL   | .....T..... | ..Y...G.G   | .....I..A      | ..I.....     | 200 |
| AmelC  | ..L.Y..G.   | ..NL...AIK  | ..KR.....    | ..LKD..SE.ER  | MTN..K..ED    | ..S..K..AL   | .....T..... | ..YI..G.G   | .....I..A      | ..I.....     | 200 |
| Gac1C  | ..L.Y..G.   | ..NL...LIK  | ..NRH.....   | ..LMD.TEYER   | MTS.SED.ES    | ..G..K..AL   | ..T.....    | ..Y...G.G   | .....I..A      | ..M...I..    | 200 |
| TrulC  | ..R.Y...A   | ..NL...A.K  | ..KR.....    | ..LMD.AQYEH   | VTK..A..ES    | ..S..K..AL   | ..VT.....   | ..Y...G.G   | .....I..A      | ..I.....     | 200 |
| Tn1C   | ..R.Y...G   | ..NL...A.K  | ..KR.....    | ..LMD.AQYER   | V.K..A..ES    | ..S..K..AL   | ..VT.....   | ..Y...G.G   | .....I..A      | ..I.....     | 200 |

Table with columns: Identifier (e.g., OlalCb, OnilCa), Source (e.g., HL, SR), Target (e.g., LTR, LE), and Score (e.g., 200). Rows include various identifiers like Gac\_0, TrilC, Dre1C, etc.

Table with columns: Identifier (e.g., Hsa1C, SSc1C), Source (e.g., AARAGNAVHA), Target (e.g., LLLYRHLNLR), and Score (e.g., 300). Rows include various identifiers like MmulC, Hsa1A, MmulA, etc.

Table with columns: Identifier (e.g., Hsa1C, SSc1C), Source (e.g., EEHLAALTA), Target (e.g., PRGTWAQVRT), and Score (e.g., 400). Rows include various identifiers like MmulC, Hsa1A, MmulA, etc.

Ler1C .KY.....G K.IP..K.K .YFSSGKT.M DS..K..... T..EDTPE.F VDNQK...Q. .KS..H.KCY .....F ...A...V.. NA.....A 400
CmilC .....G N.IP.GKA.K .FFSNRGRSS. DC..K.....L T..GDKP..Q V..K..... .KL..H.KCY .....E...V.. NA.....A 400
AcalC .K.P.....G E.DP..RA.N AFFQTGEQS. SI..K..... T..TSEQ..R EPN.Q..... .KS..H..CC .....YR...S.. NA.....A 400
LchlC .....P.....G D.VP..KA.R DYFQSGRQS. DL..K..... T..DTEQRYD TKN.K...I. .KS..H.KCY .....V..K...TM.. NA.....A 400
Tn1A .K.....G T.TP..NA.D TYFSRQKQ.. D.I.K..... T..DTEQRYD TNN.V...S. .KC..H.KCY .....N...K...TM.. NA.....A 400
Tr1A .R.....G D.TP..NA.D TYFSRQKQ.. D.I.K..... T..DTEQRYD TNN.T...S. .KS..H.KCY .....N...K...TM.. NA.....A 400
On1A .....G D.TP..KA.E .FFSRGKQS. D...K.....L T..DTEQRYD TKN.K...I. .KS..H.KCY .....LNM...YK...TM.. NA.....A 400
Gac1A .K.....G D.TP..NA.E TYFSRQKQS. D.I.K...C. T..DTEQRYE SDN.Q..VS. .KS..H.KCY .....N...YK...TM.. NA.....A 400
DrelAa .....G D.VP..KA.S QFFIRGKQS. D..K..... T..DTEQRYE PDN.Q...S. GKS..H.KCY .....LN...K...TM.. NA.....A 400
TfulA2 .T.....G D.VP..KA.E .EFFSTGRKS. D...K..... T..DTEQRYE PDN.Q...S. .KS..H.KCY .....N...I...K...TM.. NA...T...A 400
DrelAb .T.....G D.VP..CA.N AYLRHGKKS. DS..K..... T..DTEQRPD QKN.E...R. .KS..H.KCY .....IN...I...K...TM.. NA.....A 400
TfulA1 .K.....G D.VP..CA.D AYLR.GRQS. D..K..... T..DTEQRHN SDS.E...RSF GKS..H.KCY .....N...IYK.ATI.. NA.....A 400
OlalCa .AK.G....D.VS..EA.V KYFSSGKRS. DVI.R..... T..D.EQ.TM .D.Q...N. .KS..H.KCY .....SV.YYK...S.I NG.....A 400
On1Cb .AK.G....D.IP..KA.. KYFSSGKRS. DCI.K..... T..D.EQ.MM GD...R. .KS..H.KCY .....V.VYK...N.I NA.....A 400
Ame1C .K.G.F..G.D.IP..KA.K .EFFSSGKRS. DCI.K..... T..DDEQ.MM GD...NV.R. .KS..H.KCY .....SV.VI...K...N NA.....A 400
Gac1C .AK.G....D.IP..KA.A KYFSSGKRS. DFI.K..... T..DDEQ.GV AD..TRI.S. .KS..H.KCY .....SV.VY.K...M. NG.....A 400
TrulC .AR.G....D.IP..KA.A KHFNSSGKRS. DCI.K..... T..D.EQS.V GDNLE...C. IKS..H.KCY N.....SV.VFYK...S.. NG...G.A 400
Tn1C .AK.G....D.TP..RA.A KYFSSGKRS. DCI.K..... T..D.EQ.IM GDNLE..H. IKS..H.KCY K.....SV.VFYK...S.. NG...G.A 400
OlalCb .K.G....G.D.VP...I.K .EHFSSGKRS. DII.K..... T..D.AQ.MK GD...GN.R. .KS..H.KCY .....SI.VIYK...S.. NA.....A 400
On1Ca .K.G....G.D.IP...M.K QYFSSGKRS. DCI.R..... T..D.EQ.MR GD...GN.S. .KS..H.KCY .....SV.VIYK...S.. NA.....A 400
Gac\_0 .K.G....G.E.VP..F.M.E RHFSSGKRS. DCI.R..... T..D.EQ.MR G...GN.R. .KS..H.KCY .....SI.VIYK...S.. NA.....A 400
Tr1C .K.G....G.D.IP...K QYFSSGKRS. DVI.K...I.T. D.EQ.MR G...GN.R. .KS..H.KCY .....SI.VIYK...N.. NA.....A 400
DrelC .K.G....G.N.TP..R.K QYFSSGKQS. DCI.K..... T..DQAE.MK G.N.EN.R. .KS..H.KCY .....SV.V.YK...N.. NA.....A 400
DrelB .LK.PS..G.N.VP..RA.L KYFEGGRAS. .I.T...L T..D.AH.YD P.NIR...L. .KS..H.KCY .....N...YK...M.V NT.....S 400
On1B .LK.....G.Y.IP...A.I KYFS.GKVS. D.I.S...L T..D.Q.YD PAKSN...S. .KS..H.KCY .....SYP...M.V N.. NA.....A 400
Gac1B .LK.....G.H.VP...S.I KYFG.GKVS. D.I.S...L T..D.Q.YD PAKAK...S. .KS..H.KCY .....SYP...V.V NA.....A 400
OlalB .LK.....G.N.VP...A.I KHFSHGKTS. D.I.S...L T..D.SQ.YD GVKK...S. .KS..H.KCY .....SYP...M.V N.. NA.....A 400
TrulB .LK.....G.N.VP..RA.S KYFS.GKVS. D.I.S...L T..D.Q.YD QAR.R...S. .KS..H.KCY .....SYP...M.I N.. NA.....A 400
Tn1B .LK.....G.N.VP...A.A KYF..GKAS. D.I.S...L T..D.Q.YD HARSR...S. .KS..H.KCY .....SYP...M.I N.. NA.....A 400
HsalB .K.....G.G.VE...A.Q AFFSSGKA.. .I.R..... A.E.SYSYD P..E..SL. GK..H.NCY N.....S.K.Q... NA..A..A 400
MmulB .K.....G.G.VE..EA.Q TFFSSGKMS. D.I.R..... T..EDSHCYN PD.ET..SL. GK...H.NCY N.....SCK..L... NT.....A 400
McolB .K...F..G.G.VQ..EA.Q TYFNTGKAS. .I.K..... T..E.SH.D P.NE...SL. GKS..H.NCY N.....N..S.K.A... NT.....A 400
ShalB .K.....G.G.VQ..EA.Q TYFNTGKAS. .I.K..... T..E.SH.YD P..E..SL. GK...H.NCY N.....VA.K... NT..A..A 400
AcalB .R.....G.E.LP..EA.E KYFSRQKAS. DC..R..... T..E.EH.FD PDKED...R. SKS..H.QCC .....S.V.YR...A NA.....A 400
FpelB .R.....G.E.VP..EA.A RHFSSGKVS. D.I.R...L T..E.EH.YV AGKEGCM.T. .KS..H.QCY .....V.YK...A NA.....A 400
Xtr1B .K.....G.N.VH...A.. NFFSNGRT.. SC..R.V..I .E.E..YD E..K.S..S. SK...H.NCY N.....S.V.R... NA.....A 400
LchB RKGSVRISLS C.IP..KA.S .EFFSHGKIS. T.I.R...M T..D.EQAV K.N.TT.S. .KS..H.KCF .....F...K...I NT.....A 400
Dm .....W.N.SK..EA.N TFFSWGQTS. RTI.S...VL .D..FEPD LAR.EL..NF GKK..H.N.Y N.....C.V.C.GT..RV.F NA..T.S.AA 400
ci .....G.E.IP..KA.N TYFVDGKKS. H.I.K...IL V..D.EHVVS D..S...SK. GRS..H.KCY N.....T.NC...K..RW.I NA.....A 400

HsalC ISGHMWEFTL ATECQLGYST DGHCKGHPDP TLPQPQRLQW DLPDIHSSIS LALRGAKILS ENVDCHVVPF SLFGKSFIR CHLSSDSFIQ IALQLAHPRD 500
Ssc1C .....A .....S.....H.....L.....QA.A I...F... .H.....K..... T..... 500
MmulC V...L.....A .....E.QP...T...G.I...F... .H.....KC...V.....LV..... 500
HsalA .VA.L..YVM SIDS...AE .....DIN. NI.Y.T... .I.GCQEV.E TS.NT.NL.A ND..F.SF.. VA...GI.KK .RT.P.A.V. L.....YK. 500
MmulA .V..L..YVM .DV...E .....DKN. NI.K.T... .I.GCQEV.E TS.SS.SF.A ND..L.SF.. DT...GL.KK .RT.P.A.V. L.....YK. 500
McolA .V..L..YVM .D...TE .....DTN. NI.Y.T... EI.ECQDV.E ES.SL.ST.A ND..F.SF.. DA...EL.KK .RT.P.A.V. L.....YK. 500
GgalA .V..L..NVM .YE...LE .....DTNQ NI.I.TK... EI.ECQDV.E RS.ST.RA.A DD..FYSFY. DV...GL.KK .AKT.P.A.V. L.....Y. 500
FpelA .V..L..NVM .YE...E .....DINQ NI.I.TK... EI.ACQEV.E RS.ST.IA.A DD..FYSFF. DA...GL.KK .AKT.P.A.V. L.....Y. 500
AcalA .V..L..NVM FSD...E...TE .....ESSS GILM.S..... EILECQEV.E RS.AV.RP.A DD..F.SF.. DT...GLMKK .AKT.P.A.V. L.....Y. 500
Xtr1A .V..L..YVM .DKE...NE .....DVNG NI.P.S... .I.ECQNVVE ES.TV..A.A DD..F.SF.. NS...GL.KK .RT.P.A.V. LS.....Y. 500
LchlA .V..L..YV .DS...TE E...E.K. SI.F...R. EI.ECQEV.E IS.KV..A.A DD..F.SF.. DS...GL.KK .RT.P.A.V. L.....YV. 500
Ler1A .I..L..YV .DQ...TD E.N...E.N. QIQP..... .IEECQEV.H QS.SV.QQ.A DD..F.SF.. DK...GV.KK .WI.P.A.V. M.....Y. 500
Xtr1C .V...YV .D...NE E.N...QV.S N..V... .EISECQEV.Q SS.AV.QA.A DD..F.TF.. KE...GL.KK .RT.P.A.V. ....Y. 500
Ler1C .I..L..YA .DT...KE .N...D.A. NV.L... .I.KCQEV.M SS.KV.QT.A ND..FYAF.. TR...GV.KK .RT.P.A.V. ....NY. 500
CmilC .I..L..YV .DS...ND Q...DAES .VLS... .I.ECQEV.. GS.KV.QS.A ND..F.TF.. TK...GL.KK .RT.P.A.V. L.....N.. 500
AcalC .V..L..YV .DAT...DA Y.N...DM.. NV.P..K... EI.PCEAV.M QSF.V.YN.A SDI.F.AFT. KD...GL.KK .RT.P.G... L.....Y. 500
LchlC .I..L..YV .DT.I..KP .....EA.S .ILP... .I.ACREEV.K MS.AV.QT.A ND..F.FT. KD...GL.KK .RT.P.A.V. ....Y. 500
Tn1A .V..L..QV .SMDPN...TE .....R.A.H. N..G... .ISTCQOV.Q SS.TV.QK.A DD..S.II.. .E...GK.KK .RT.P.A.V. ....Y. 500
Tr1A .V..L..HV .SMDPN...TE E...R.V.H. N..G..K... .I.ACQEV.E SS.TV.QN.A DD..S.II.. .E...GK.KK .RT.P.A.V. ....Y. 500
On1A .V..L..HV .SMDPK...TE .....V.K.H. N..G... .TI.ACQEA.E SS.TV.RA.A DD...II.. TD...GL.KK .RT.P.A.V. ....Y. 500
Gac1A .V..L..HV .SMDPK...TE A...E.H. N..G..K.S. .I.ACQEV.Q SS.KV.RT.A DD..S.IM.. .D...GL.KK .RT.P.A.V. ....Y. 500
DrelAa .V..L..QV .SSDR...TE E...N.H. NM.G... .I.ECQTV.. SS.KV.NT.A DD..M.IF.. ND...GL.KK .KT.P.G... L.....Y. 500
TfulA2 .V..L..HV .SMDPT...TE .....R.K.H. N..G..L... .ISVQ.V.R SS.KV.NA.A DD..M.IF.. NN...GL.KK .KT.P.G... 500
DrelAb .V..L..QV .SMDPK...TE .....E.H.A N..G... .NI.TCQTM.T NS.SV.EA.A DD..S.II.. .D...GL.KK .RT.P.A.V. L.....Y. 500
TfulA1 .I..L..NV .S.DAK...TD .....A.QTHR N..G... .NI.PCQTM.A NS.SV.QA.A DD..MVII.. QE...GL.KK .KI.P.A.V. ....N.K. 500
OlalCa VVA.V..YV .DS...NE E...EV.A S...K.N. EISPCEEQ.. RS.AV.QA.A DD..F.LS. RD...GQ.KK .KV.P.A.V. MT...YY.E 500
On1Cb VLA.V..Y.. .NDS...NA E...DV.. S..R.VK.S. EI.PCEEQ.A QS.AV.QA.A DD..F.FS. QE...GKVKK .RV.P.G... M...Y..E 500
Ame1C .VS...YA .DS...NE E...DVN. S...T... .I.KCQEV.A QC.AV.QP.A DDI.F.FA. RD...GS.KK .IKM.P.G... L...FY. 500
Gac1C VLS.A.QYV .T.D...NA E...EV.S S..G..K.N. EI.PCEEQ.. GS.AV.QA.A DD..V.FS. EE...GK.KK .RV.P.A.V. LT...Y.N 500
TrulC VLT.L..Y.. .NDS...NA E...EV.A S.AE..K.N. EISSCEEQ.. QS.EV.QA.A ND..M..V. RD...AKVKK .RVNP.A... ..YY. 500
Tn1C VLS.L..Y.. .NDS...NA E...EV.A S..K..K.N. EI.ECQEV.C QS.AL.QA.A DD..M..V. RD...AKVKK .RVNP.A... ..Y. 500
OlalCb TVA.L..Y.. .DA...TE .....EV.R S..P.H.S. EI.SVQDV.F SS.TL..A.A DD...F. RD...GK.KK .LRV.P.A.V. .S...Y.. 500
On1Ca TVA.L..Y.. .DA...TE .....EVE. S...V. NI.AVQAQV. SS.AV.QA.A DD...F. RE...GR.KK .RI.P.A.V. .S...YY. 500
Gac\_0 TVA.L..Y.. .DA...TE .....DV.R S..P..A. .I.SVQAQA. SS.TV.RA.A DD...F. RD...GR.KK .LRV.P.A.V. .G...Y.. 500
Tr1C TVA.L..Y.. .DAH...TE .....EVE. L..H...L. .I.LCNTQVQ. SS.AV.QA.A DD...I.H. RD...GR.KK .LRV.P.A.V. .S...YY. 500
DrelC .VA.L... .DTH...NS .N.R.DV.H S.H...S. .I.FVQTQ.. ES.AV.QA.A DD...F. RK...GL.KK .MK.P..V. L...YY. 500
DrelB .I...YV .D.H...TA E...DVNK .S.P...T... .I.KCQEI.E GSY.I..GIA DD..F.GCL. NE...GL.KK .RT.P.A.V. L...QY. 500
On1B .V...YI .D.H...TE E...DVNK N..H..T... .QI.NCQNV.E TSYLS..QIA DD..F.GYL. AE...GL.KK .RT.P.A.V. L...Q. 500
Gac1B .V...YV .D.H...TE E...DVNK G..H..S... .QI.NCQEV.E TSYLS..LIA DD..F.GYL. HE...GL.KK .RT.P.A.V. L...Q. 500
OlalB .V...YV .D.H.C.E E...DANR G..F.T... .QISKQDV.E ASYLS..KIA DD..F.GHL. TE...GL.KK .RT.P.A.V. L...Q. 500
TrulB .V...YV .S.D.H...TE E...DVNK G..Y..S... .QI.VCK.I.E ASYVS..RIA DD..FYGCL. HE...GL.KK .RT.P.A.V. M...Q. 500
Tn1B VV...V. .D.H...TE E...DVNK G..Y..S... .QI.VCQ.I.E ASYVS..QIA DD..F.GCL. HE...GL.KK .RT.P.A.V. M...Q. 500
HsalB .I..L..V. G.DSH...TE T...L.K.N. A.AP...T... .I.KCQAV.E SSYQV..A.A DD.ELYCFQ. LP...GL.KK .RT.P.A.V. 500
MmulB .I..L..V. G.DTH...TE T...V.E.NT .P...P... .I.ECREA.E NSYQV..A.A DD.ELYCFQ. LP...GL.KK .RT.P.A.V. 500
McolB .V..L..V. .DAH.D.TD A...Q.K.NH S.AP...L. .I.ECQEL.E SSYQV..T.A DD.ELYCFH. AT...GL.KK .RT.P.A.V. 500
ShalB VV..L..V. .DAH.D.NE S...Q.K.NH S.AP... .EI.ECQKI.E SSYEV..A.A DD.ELYCFQ. LP...GL.KK .RS.P.A.V. 500
AcalB .I..L..M. .DAH..CS .....H.V.NT A.P...T... .I.ECCND.E ASYAV.RA.A DDI.F.SFR. VE...GR.KK .RT.P.A.V. 500
FpelB .I..L..A. .K...TD R...R.E.NT Q.AP... .I.QCRDT.E SSYL.R.A.A DD..FCCFQ. .E...GL.KK .RT.P.A.V. .S..... 500

XtrlB .I.L.....D.E...TE .N.R.DAGS P.P.Y....I.PCREVE.E RSYVT..AIA DD..F.CLC. .D...GL.KK .RS.P.A.F. ....Y.E 500  
LchB VI..L...V. .D.E.S.TE S....EMNK K..P.....ECKEM.Q QSYKV..A.A DD.NFCCF..MS...GM.K. FKT.P.A... 500  
Dm .AS...NLI VDDLSD..DE T.NT..T.AF QP.T.T..T. .Q.KPCLAQ.E E.TIDVTK.I NE.NLRILVH QDY..G.MKK .RT.P.AY..M...YY.. 500  
ci .MSYVV.EA. GF.YS...TQ .RV..R.TV QPIT.H....Q.TPCQEV.E TS.SV.NN.A DD.HLN.SA. KH...GLVKK FKM.P.A...A...I..L.. 500

Hsa1C RGQFCLTYES AMTRLFLEGR TETVRSCTRE ACNFVRAMED KKTDPQCLAL FRVAVDKHQQA LLKAAMSSGGQ VDRHLFALYI VSRFLHLQSP FLTQVHSEQW 600  
Ssc1C .R.....S.....H Q.....L.....Q..R.....D..... 600  
MmulC .Q.....DN .E..QH.....I.....M..L..M.....Q..Q.. 600  
Hsa1A M.K.....A S.....R.....T. S.D.....V. PQ.VE.R.K. .KL.SE..H MYRL..T.S. I.....C..V ..KY.AVE...KE.L.P. 600  
MmulA M.K.....A S.....R.....T. S.....L..M. PT.AE.RFK. .KI.CE...H .YRL..T.A. I.....C..V ..KY.AVD...KE.L.P. 600  
Mdo1A M.K.....A S.....R.....M. S.....L..VN PESVENK.K. L.I.AE...H MYRL..T.A. I.....C..V ..KY.AVD...KE.L.P. 600  
GgalA M.K.S...A S.....R.....I. S.....QT..N PESNENKMKKS .L.AT...H .YRL..T.A. I.....C..V ..KY.SVD...KE.L.P. 600  
FpelA M.K.S...A S.....R.....V. S.....T... PESSENK.KF .I.AA...H .YRL..T.A. I.....C..V ..KY.AVD...KE.L.P. 600  
AcalA M.K.....A S.....R.....TQ S.K.K..D. PE.LEKKI...KA.ATH..L .YRL..T.N. I.....C..V ..KY.AVE...KE.L.P. 600  
XtrlA KEK.....A S.....R.....I. S.D..L..S. PQ.NEKR.Q. .KE.AE...Q MYRL..T.S. I.....C..V ..KY.GVD...KE.L.P. 600  
LchlA K.K.Y...A S.....R.....V. S.....LS.V. PQ.NE.R.K. .KI.SE...N MYRL..T.A. I.....C..V ..KY.GVD...KE.L.P. 600  
Ler1A K.K.....A S.....R.....SQ STQ..L..VN SQ.NEEK.K. .L.A...S MYRH..T.E. I.....C..V ..KY.GMD...KE.L.P. 600  
XtrlC K.K.....A S.....R.....V. SSQ..K..MN PQ.NEER.K. .L.AE...M .YRH..T.G. I.....C..V ..KY.GVD...KE.L.P. 600  
Ler1C K.T.....S.....R.....V. T...T.LDG .HSNEE..N. .I.AKN..H ISRL...C. I.....C..V ..KY.GVS...QE.L.P. 600  
CmilC K.K.....S.....R.....IQ SS.....HLSASE..K. .HL.AKT..H ISRLS.A.C. I.....C..V ..KY.GVH...QE.L.P. 600  
AcalC KKK.....A S.....R.....I. S.....K..M. PQD.SAR.H. .AE...N .YRQ..T.A. I.....C..V ..KY.G.D...RE.L.P. 600  
LchlC K.K.....A S.....R.....S. S.A..K..V. AY.NAAR.K. .K.AE...Q MYRL..T.A. I.....C..V ..KY.GVD...NE.L.P. 600  
TrilA K.K.....A S.....R.....V. S.A...S.IR DE.TEER.R. LKK.AE...N .YRL..T.E. I.....C..V ..KY.GED...KE.L.P. 600  
TrulA K.K.....A S.....R.....M. S.A...S.IR DE.TEER.R. LKK.AE...N MYRL..T.E. I.....C..V ..KY.GEE.A...KE.L.P. 600  
OnilA K.K.....A S.....M.R.....T. T.A...V.G DE.REER.R. LKL.AE...N .YRL..T... I.....C..V ..KY.GED...KE.L.P. 600  
Gac1A KKK.....A S.....R.....S. S.A...IK GE.RDE..R. LKQ.AE...N MYRL..I.E. I.....C..V ..KY.GED...KE.L.P. 600  
DrelAa K.K.....A S.....R.....N. T.A..H..M. EA.REER.K. LKA.TE...N .Y.L..T.K. I.....C..L ..KY.GED...KE.L.P. 600  
TfulA2 KKK.....A S.....R.....M. T.D...M. EQ.REEK.R. LKL.AE...E .YRM..T.K. I...I.C..V ..KY.GDD.A...KE.L.P. 600  
DrelAb K.K.....A S.....R.....T. S.A...NS NH.RE.K.Q. LKN.AE...Q MYRL..T.H. I.....C..V ..LKY.GQD...KE.L.P. 600  
TfulA1 K.K.....A S.....R.....I. TSA..K..VN NE.REKK.R. L.H.AGN..H MYQM..T.K. I.....C..V ..QY.QQD...KK.L.P. 600  
OlalCa .T.....A S.....R.....N. SSA...L.N. GQPADV.RR. .G.SE...Q .YRM..T.A. I...I.C..V ..KY.G.E...KE.L.P. 600  
OnilCb .T.....A S.....R.....N. SSA..I..L.G GEATDV.KC. .SE...L .YRL..T.A. I.....C..V ..KY.GVE...KE.L.P. 600  
Ame1C .M.....A S.....R.....SS. S.A..K..F.N GEDVEV.RR. I.N.SE...M .YRL..T.A. I.....C..V ..KY.GIE...KEAL.P. 600  
Gac1C Q.R.....A S.....K.....N. S.A...L.G GEDADV.RR. .HE.SE...Q .YRM..T.A. I.....C..V ..KY.QVE...KE.L.P. 600  
TrulC QKR.S...S.....R.....N. S.A..I..L.G GE.TDV.RR. .T.SE...R .CRM.ST.A. I.....C..V ..KY.GVE...KELE.A. 600  
TrilC QKR.S...S.....R.....N. S.A..I..L.G GE.TDV.RR. .T.CE...R .CRM.ST.A. F.....C..V ..KY.GVE...KE.L.A. 600  
OlalCb .S.....A S.....R.....SNQ S.A..K..L.G GEGAD..KR. .Q.SE...N .YRM..T.A. I.....C..V ..KY.GVD...KE.L.P. 600  
OnilCa .SG.....A S.....R.....SN. S.A..K..L.S GE.EEE.RR. .QL.SE...N .YRM..T.A. I.....C..V ..KY.GVE...KE.L.P. 600  
Gac\_0 .G.....A S.....R.....SN. SSA...L.T. EAVD..RH. .L.SER..N .YRM..T.A. I.....C..V ..KY.GVD...KE.L.P. 600  
TrilC .S.....A S.....R.....N. SAA..K..L.N GEDEES.RH. .L.SET..N .YRM..T.A. I.....C..V ..KY.GVD...KE.L.P. 600  
DrelC .T.....A S.....R.....SN. S.A..L..L.G GEDRE..RK. L.KTAE...N .YRL..T.S. I.....C..V ..KY.GVE...KE.L.P. 600  
DrelB K.E.....S.....M.R.....C. STA...DT.NE.R...KQ.AE...N MYRL..T.A. I.....C...KVMGID...K.L.P. 600  
OnilB QRV.....S.....M.RD.....S. .VA.....AA.NA.R...K.AE...N MYRL..T.S. I.....C...KY.GVD...K.L.P. 600  
Gac1B Q.V.....S.....M.RD.....T. .VA.....EA.KA.R...K.AE...N MYRL..T.S. I.....C..L ..KY.GVD...KK.L.P. 600  
OlalB Q.V.....S.....M.RD.....S. .VA.....VA.NA.R.S. .QK.AE...N MYRL..T.S. I.....C...KY.GAD...NK.L.P. 600  
TrulB Q.L.....S.....M.RD.....S. .VA...K..S AS.NA.R...K.A...N MYRL..T.S. I...LC...I.KY.NVD...KK.L.P. 600  
TrilB Q.L.....S.....M.RD.....S. .VE...S AA.NA.R...K.A...N MYRL..T.S. I...LC...KY.GVD.L...KK.L.P. 600  
HsalB .K.....A S.....M.R.....STA.Q..ME GH.KADLRD. .QK.AK...N MYRL..T.A. I.....C..L ..KY.GVS...AE.L.P. 600  
MmulB K.K.....A S.....M.R.....N. SAA..Q..MK GHKKQDLQD. .K.SE...N MYRL..T.A. I.....C...KY.GVS...AE.L.P. 600  
Mdo1B K.K.....A S.....M.RD.....T. .TA..Q..M. SYMK.DLQD. .K.AE...L .YRL..T.A. I.....C..V ..KY.G.H...A.L.P. 600  
ShalB K.N.....A S.....M.RD.....T. TTA...T..M. SYMK.DLQD. .K.AE...H .YRL..T.A. I.....C..V ..KY.G.H...A.L.P. 600  
AcalB K.R.....A S.....R.....S. .TA...S.A. PCSSSER.E. .H.AE...H .YRL..T.S. L.....C..V ..Y.GVE...DK.L.P. 600  
FpelB K.C.....A S.....R.....A. STA...S.G. A.VTERQR. .KL.A...H MYRL..T.A. I.....C..V ..Y.GI...A.L.P. 600  
XtrlB K.H.....A S.....RD.....TQ TSD..K... PQSQEKR...Y.A.AEH..L MYRW..T.K. I.....C...KY.GTD.A...QK.L.P. 600  
LchB K.A.....S.....RD.....N. T.A..Q..L. T...KER.S. .K.SE...Y .YRL..T.A. I.....C..V ..K.GVH...N.LA.P. 600  
Dm A.R.S...A S.....R.....P..I. SSAW..K..QN PT.NDERVKM MQA.C.R..L GYQD..C.R. I.....C..V ..KY.EVD...NE.L.P. 600  
ci K.R.S...A S.....R.....S. M.A.AKS... DF.NKDRY. LKK...R.IN GY.E..T...I...I.C..V ..KY.K.E...QK.LQ.P. 600

Hsa1C QLSTSQIPVQ MDDPYVSSGG GFGPADDHGY GVSYIFMGDG MITFHISKK SSTIT 655  
Ssc1C .A.....E.....T.ED T.....R. 655  
MmulC L...V...T...H...I...EN A...E 655  
Hsa1A R...T.Q.V.E...VA.D...LV.EN L.N...F .CPE. 655  
MmulA R...T.Q.V...C...VA.D...IV.EN F.H...F .PE. 655  
Mdo1A R...T.Q.VN.E...VA.D...IV.EN L.N..V..F .PE. 655  
GgalA R...T.QH I..EML...VA.D...ILDEN S.H..V..F .CSE. 655  
FpelA R...T.QH I..EML.C...VA.D...ILDEN S.H..V..I .CSE. 655  
AcalA R...T.QH I..GME...VA.D...IV..N L.N..V..Y .CPE. 655  
XtrlA R...T.Q.VQ.EN...VA.D...IV.EN L.N...F .PE. 655  
LchlA R...T.Q.V.E...VA.D...LV.EN L.NL.V..L .LE. 655  
Ler1A K...T...K...VA.D...MV.EN L.NM...F .PE. 655  
XtrlC R...T.I.V.E...C...VA.D...IV.EN L.N...F .HE. 655  
Ler1C C...T.I.I.E.I.I...VA.D...IV..H L.N...C.V .PL. 655  
CmilC S...T.L.V.E.I.C...VA.D...FIV.EN L.N...C.V .QY. 655  
AcalC R...T.I.L...V..N...IV.ED L.N..V.C.V .PE. 655  
LchlC R...T.I.A.E...C...VA.D...IV.ED L.N...G.I .GLD. 655  
TrilA R...T.L.L.E.E.T...VA.D...IL.EN L.N...R .PE. 655  
TrulA R...T.V.E...VA.D...IV.EN L.N...R .PE. 655  
OnilA K...T.L.V.E...VA.D...IL.EN H.N...R .PE. 655  
Gac1A R...T.L.V.E...A...VA.D...IL.EN L.N...H .PE. 655  
DrelAa R...T.L...E..T...VA.D...IL.ED L.N...H .HE. 655  
TfulA2 R...T.L.I.E..T...VA.D...IL.ED L.N...Y .IE. 655  
DrelAb R...T.L.G.E..T...VA.D...A.VIV.EK L.N...R .PE. 655  
TfulA1 R...T.L.P.E...VA.D...A..IV.EN L.N...C.Y .PEA. 655  
OlalCa R...T.SI.V.E.I.C...VA.D...N.I.EN V.N...C.H .CPS. 655  
OnilCb R...T.I.V.E...C...VA.D...CVL.EN .N...C.H .CPD. 655  
Ame1C R...T.F.L...ITC...VA.D...SLI.EK I.S..V..H .CPD. 655  
Gac1C R...T.L.V.E...C...VA.D...CAL.EK .L.S...TC.H .CPN. 655  
TrulC R..S.H..YM I..E.LCY...VT.D...C.LML.GD VL.L...C.N .CPD. 655

|               |            |             |            |            |            |       |     |
|---------------|------------|-------------|------------|------------|------------|-------|-----|
| <b>Tn1C</b>   | ..AS.HV.HM | I..E.LCY..  | ....VT.G.. | ..C.LML.GD | VL.L.V.C.N | .CPA. | 655 |
| <b>OlalCb</b> | R.....T... | ....F.L.L.. | ....VA.D.. | .....IV.ED | ..N..V...H | .CGE. | 655 |
| <b>OnilCa</b> | R.....T... | ....FI.L..  | ....VA.D.. | .....IV.ED | .VN..V...Y | .CSQ. | 655 |
| <b>Gac_0</b>  | R.....T... | ....FI.L..  | ....VA.D.. | .....IV.ED | ..N..V...H | .CSE. | 655 |
| <b>TrilC</b>  | R.....T.I. | I.....L..   | ....VA.D.. | .....IT.ED | ..N..V...H | .CNQ. | 655 |
| <b>Dre1C</b>  | R.....T... | ....EFI.L.. | ....VA.D.. | .....I..ED | ..N..V.C.H | .CKE. | 655 |
| <b>Dre1B</b>  | R.....T.Q. | L..K...A..  | ....VA.D.. | .....IV.EN | L.....F    | ..PE. | 655 |
| <b>OnilB</b>  | K.....T.Q. | L..K..GG..  | ....VA.D.. | .....IV.EN | L.....F    | ..PD. | 655 |
| <b>Gac1B</b>  | R.....T.Q. | L..K...A..  | ....VA.D.. | .....IV.EN | L.....F    | ..PD. | 655 |
| <b>OlalB</b>  | R.....T.Q. | L..K..GA..  | ....VA.D.. | .....IV.EN | L.....F    | ..PN. | 655 |
| <b>Tru1B</b>  | R.....T.Q. | L..K..GA..  | ....VA.D.. | .....IV.EN | L.....F    | .CPH. | 655 |
| <b>Tn1B</b>   | R.....T.Q. | L..K..GA..  | ....VA.D.. | .....II.EN | L.....F    | .CPH. | 655 |
| <b>HsalB</b>  | R.....Q.   | I..NHLGA..  | ....VA.D.. | ....MIA.EN | T.F.....F  | ..SE. | 655 |
| <b>MmulB</b>  | S.....Q.   | I..NHLGA..  | ....VA.D.. | ....MIA.EN | TMF.....Y  | ..SE. | 655 |
| <b>MdolB</b>  | R.....AQ.  | I..NHIAA..  | ....VA.D.. | ....MIA.EN | T.F..V...F | ..SE. | 655 |
| <b>ShalB</b>  | R.....TAQ. | I..NHLAA..  | ....VA.D.. | ....MIA.EN | T.F.....F  | ..SE. | 655 |
| <b>AcalB</b>  | R.....T.Q. | I..ECA..... | ....VA.D.. | .....IA.EN | LV...V...F | ..PE. | 655 |
| <b>FpelB</b>  | R.....T.Q. | L...H.....  | ....VA.D.. | .....IA.EN | L...V...F  | ..SE. | 655 |
| <b>XtrlB</b>  | R.....T.Q. | L...H...A.. | ....VA.D.. | .....A.EN  | L..L.....F | ..PE. | 655 |
| <b>LchB</b>   | A.....T.Q. | TN.....     | ....VAED.. | .....IV.ED | L.....Y    | ..PE. | 655 |
| <b>Dm</b>     | R.....T.H. | T..NCI.A..  | ....VA.D.. | .....IA.EN | L.F....A.T | TCQQ. | 655 |
| <b>ci</b>     | R.....T.H. | A..NFL.G..  | ....VA.D.. | .....ICHEN | L.M..V...Y | ..SE. | 655 |
