# Supplementary material for: The Origin and Diversity of Cpt1 Genes in Vertebrate Species
Source: PubMed Central journal article supplement (PMC4589379; doi:10.1371/journal.pone.0138447), 2015-09-30
Supplement: pone.0138447.s007.pdf [file pone.0138447.s007.pdf]

**Supporting information 1 Table:** List of sequences used for the molecular phylogenetic analysis and respective accession numbers (GenBank or Ensembl).

| Species                | Gene   | Accession number   |
|------------------------|--------|--------------------|
| <i>A. carolinensis</i> | CPT1A  | XP_003214835.1     |
|                        | CPTC   | XP_003222743.1     |
|                        | CPT1B  | ENSACAP00000001055 |
| <i>C. intestinalis</i> | CPT1   | ENSCINP00000007072 |
| <i>C. milii</i>        | CPT1C  | AGD98733.1         |
| <i>D. melanogaster</i> | CPT1   | CAB52415.1         |
| <i>D. rerio</i>        | CPT1Aa | XP_002666893.2     |
|                        | CPT1Ab | XP_005166530.1     |
|                        | CPT1Ca | XP_005164116.1     |
|                        | CPT1Cb | XP_002666747.2     |
|                        | CPT1B  | XP_005159068.1     |
| <i>F. peregrinus</i>   | CPT1A  | XP_005236351.1     |
|                        | CPT1B  | XP_005243516.1     |
| <i>G. aculeatus</i>    | CPT1A  | ENSGACP00000014767 |
|                        | CPT1Ca | ENSGACP00000010584 |
|                        | CPT1Cb | ENSGACP00000008742 |
|                        | CPT1B  | ENSGACP00000016316 |
| <i>G. gallus</i>       | CPT1A  | NP_001012916.1     |
| <i>H. sapiens</i>      | CPT1A  | NP_001867.2        |
|                        | CPT1B  | NP_689451.1        |
|                        | CPT1C  | NP_001186681.1     |
| <i>L. chalumnae</i>    | CPT1A  | ENSLACP00000021346 |
|                        | CPT1C  | ENSLACP00000014661 |
|                        | CPT1B  | ENSLACP00000008053 |
| <i>L. erinacea</i>     | CPT1A  | KF570112           |
|                        | CPT1C  | KF570111           |

---

|                     |       |                |
|---------------------|-------|----------------|
| <i>M. domestica</i> | CPT1A | XP_001363149.1 |
|                     | CPT1B | XP_001366412.1 |

---

|                    |       |             |
|--------------------|-------|-------------|
| <i>M. musculus</i> | CPT1A | NP_038523.2 |
|                    | CPT1B | NP_034078.2 |
|                    | CPT1C | NP_710146.1 |

---

|                   |        |                |
|-------------------|--------|----------------|
| <i>O. latipes</i> | CPT1Ca | XP_004080367.1 |
|                   | CPT1Cb | XP_004071913.1 |
|                   | CPT1B  | XP_005470933.1 |

---

|                     |        |                |
|---------------------|--------|----------------|
| <i>O. niloticus</i> | CPT1A  | XP_003440402.1 |
|                     | CPT1Ca | XP_003438524.2 |
|                     | CPT1Cb | XP_003446513.1 |
|                     | CPT1B  | XP_005470933.1 |

---

|                        |       |            |
|------------------------|-------|------------|
| <i>T. nigroviridis</i> | CPT1A | CAG01138.1 |
|                        | CPT1C | CAG07569.1 |
|                        | CPT1B | CAG11364.1 |

---

|                      |       |                |
|----------------------|-------|----------------|
| <i>X. tropicalis</i> | CPT1A | XP_004913492.1 |
|                      | CPT1C | NP_001107300.1 |
|                      | CPT1B | NP_001072766.1 |

---

|                  |       |                |
|------------------|-------|----------------|
| <i>S. scrofa</i> | CPT1C | XP_005664799.1 |
|------------------|-------|----------------|

---

|                    |        |                |
|--------------------|--------|----------------|
| <i>T. rubripes</i> | CPT1A  | XP_003967444.1 |
|                    | CPT1Ca | XP_003961459.1 |
|                    | CPT1Cb | XP_003964428.1 |
|                    | CPT1B  | XP_003967147.1 |

---

|                      |        |            |
|----------------------|--------|------------|
| <i>T. fulvidraco</i> | CPT1Aa | AFO11024.1 |
|                      | CPT1Ab | AFO11025.1 |

---
